# Supplementary material for: In silico analysis of serum miRNA profiles in seronegative and seropositive rheumatoid arthritis patients by small RNA sequencing
Source: PeerJ. 2023 Jul 27;11:e15690. doi: 10.7717/peerj.15690 (PMC10387234; doi:10.7717/peerj.15690)
Supplement: Supplemental Information 3 [file peerj-11-15690-s003.xlsx]

## Sheet: Group1
miRNA	Target	Type	Annotation			hsa-miR-302c-3p
hsa-miR-362-5p	ADORA2B	protein-coding	NM_000676			hsa-miR-362-5p
hsa-miR-378g	ADORA2B	protein-coding	NM_000676			hsa-miR-378e
hsa-miR-378e	ADRA1D	protein-coding	NM_000678			hsa-miR-378g
hsa-miR-378g	ADRA1D	protein-coding	NM_000678			hsa-miR-4429
hsa-miR-378g	GRIK3	protein-coding	NM_000831
hsa-miR-4429	GRIK3	protein-coding	NM_000831
hsa-miR-378g	RPL3	protein-coding	NM_000967
hsa-miR-4429	RPL3	protein-coding	NM_000967
hsa-miR-378e	C10orf55	protein-coding	NM_001001791
hsa-miR-378g	C10orf55	protein-coding	NM_001001791
hsa-miR-302c-3p	GPATCH8	protein-coding	NM_001002909
hsa-miR-4429	GPATCH8	protein-coding	NM_001002909
hsa-miR-378g	VPS8	protein-coding	NM_001009921
hsa-miR-4429	VPS8	protein-coding	NM_001009921
hsa-miR-362-5p	CARS1	protein-coding	NM_001014437
hsa-miR-378e	CARS1	protein-coding	NM_001014437
hsa-miR-378e	LLGL2	protein-coding	NM_001015002
hsa-miR-378g	LLGL2	protein-coding	NM_001015002
hsa-miR-378e	KHDC3L	protein-coding	NM_001017361
hsa-miR-378g	KHDC3L	protein-coding	NM_001017361
hsa-miR-302c-3p	ZNF2	protein-coding	NM_001017396
hsa-miR-4429	ZNF2	protein-coding	NM_001017396
hsa-miR-362-5p	RNF215	protein-coding	NM_001017981
hsa-miR-378g	RNF215	protein-coding	NM_001017981
hsa-miR-378e	OPA3	protein-coding	NM_001017989
hsa-miR-378g	OPA3	protein-coding	NM_001017989
hsa-miR-302c-3p	MANEAL	protein-coding	NM_001031740
hsa-miR-378g	MANEAL	protein-coding	NM_001031740
hsa-miR-378g	RPL3	protein-coding	NM_001033853
hsa-miR-4429	RPL3	protein-coding	NM_001033853
hsa-miR-378e	MAPK8IP3	protein-coding	NM_001040439
hsa-miR-4429	MAPK8IP3	protein-coding	NM_001040439
hsa-miR-378e	TAC4	protein-coding	NM_001077503
hsa-miR-378g	TAC4	protein-coding	NM_001077503
hsa-miR-378e	TAC4	protein-coding	NM_001077504
hsa-miR-378g	TAC4	protein-coding	NM_001077504
hsa-miR-378e	TAC4	protein-coding	NM_001077505
hsa-miR-378g	TAC4	protein-coding	NM_001077505
hsa-miR-378e	TAC4	protein-coding	NM_001077506
hsa-miR-378g	TAC4	protein-coding	NM_001077506
hsa-miR-362-5p	PRCD	protein-coding	NM_001077620
hsa-miR-378g	PRCD	protein-coding	NM_001077620
hsa-miR-378g	MEX3A	protein-coding	NM_001093725
hsa-miR-4429	MEX3A	protein-coding	NM_001093725
hsa-miR-362-5p	ADCYAP1	protein-coding	NM_001099733
hsa-miR-378g	ADCYAP1	protein-coding	NM_001099733
hsa-miR-362-5p	FAM183A	protein-coding	NM_001101376
hsa-miR-378g	FAM183A	protein-coding	NM_001101376
hsa-miR-378e	LDB1	protein-coding	NM_001113407
hsa-miR-378g	LDB1	protein-coding	NM_001113407
hsa-miR-378g	MANEAL	protein-coding	NM_001113482
hsa-miR-4429	MANEAL	protein-coding	NM_001113482
hsa-miR-362-5p	ADCYAP1	protein-coding	NM_001117
hsa-miR-378g	ADCYAP1	protein-coding	NM_001117
hsa-miR-378g	TMEM72	protein-coding	NM_001123376
hsa-miR-4429	TMEM72	protein-coding	NM_001123376
hsa-miR-302c-3p	MAD2L2	protein-coding	NM_001127325
hsa-miR-378g	MAD2L2	protein-coding	NM_001127325
hsa-miR-302c-3p	ABLIM2	protein-coding	NM_001130088
hsa-miR-378g	ABLIM2	protein-coding	NM_001130088
hsa-miR-302c-3p	NPIPB5	protein-coding	NM_001135865
hsa-miR-378g	NPIPB5	protein-coding	NM_001135865
hsa-miR-302c-3p	LANCL1	protein-coding	NM_001136574
hsa-miR-378e	LANCL1	protein-coding	NM_001136574
hsa-miR-302c-3p	LANCL1	protein-coding	NM_001136575
hsa-miR-378e	LANCL1	protein-coding	NM_001136575
hsa-miR-362-5p	CHAC1	protein-coding	NM_001142776
hsa-miR-378g	CHAC1	protein-coding	NM_001142776
hsa-miR-362-5p	LRRC27	protein-coding	NM_001143758
hsa-miR-378e	LRRC27	protein-coding	NM_001143758
hsa-miR-378e	NAT10	protein-coding	NM_001144030
hsa-miR-4429	NAT10	protein-coding	NM_001144030
hsa-miR-378e	SLC2A6	protein-coding	NM_001145099
hsa-miR-4429	SLC2A6	protein-coding	NM_001145099
hsa-miR-378e	RAP1GAP	protein-coding	NM_001145657
hsa-miR-378g	RAP1GAP	protein-coding	NM_001145657
hsa-miR-378e	RAP1GAP	protein-coding	NM_001145658
hsa-miR-378g	RAP1GAP	protein-coding	NM_001145658
hsa-miR-302c-3p	REG4	protein-coding	NM_001159352
hsa-miR-362-5p	REG4	protein-coding	NM_001159352
hsa-miR-378e	ZNF135	protein-coding	NM_001164527
hsa-miR-4429	ZNF135	protein-coding	NM_001164527
hsa-miR-302c-3p	IQSEC3	protein-coding	NM_001170738
hsa-miR-378g	IQSEC3	protein-coding	NM_001170738
hsa-miR-302c-3p	GIMAP1-GIMAP5	protein-coding	NM_001199577
hsa-miR-4429	GIMAP1-GIMAP5	protein-coding	NM_001199577
hsa-miR-378e	PES1	protein-coding	NM_001243225
hsa-miR-378g	PES1	protein-coding	NM_001243225
hsa-miR-378e	GIMAP6	protein-coding	NM_001244072
hsa-miR-378g	GIMAP6	protein-coding	NM_001244072
hsa-miR-378e	MAN2C1	protein-coding	NM_001256494
hsa-miR-378g	MAN2C1	protein-coding	NM_001256494
hsa-miR-378e	MAN2C1	protein-coding	NM_001256495
hsa-miR-378g	MAN2C1	protein-coding	NM_001256495
hsa-miR-378e	MAN2C1	protein-coding	NM_001256496
hsa-miR-378g	MAN2C1	protein-coding	NM_001256496
hsa-miR-378e	NEIL1	protein-coding	NM_001256552
hsa-miR-378g	NEIL1	protein-coding	NM_001256552
hsa-miR-378g	CDX2	protein-coding	NM_001265
hsa-miR-4429	CDX2	protein-coding	NM_001265
hsa-miR-362-5p	CTCFL	protein-coding	NM_001269047
hsa-miR-378e	CTCFL	protein-coding	NM_001269047
hsa-miR-362-5p	OTX2	protein-coding	NM_001270523
hsa-miR-378g	OTX2	protein-coding	NM_001270523
hsa-miR-362-5p	OTX2	protein-coding	NM_001270524
hsa-miR-378g	OTX2	protein-coding	NM_001270524
hsa-miR-362-5p	OTX2	protein-coding	NM_001270525
hsa-miR-378g	OTX2	protein-coding	NM_001270525
hsa-miR-302c-3p	STX10	protein-coding	NM_001271609
hsa-miR-378g	STX10	protein-coding	NM_001271609
hsa-miR-302c-3p	STX10	protein-coding	NM_001271610
hsa-miR-378g	STX10	protein-coding	NM_001271610
hsa-miR-302c-3p	STX10	protein-coding	NM_001271611
hsa-miR-378g	STX10	protein-coding	NM_001271611
hsa-miR-378g	TAMALIN	protein-coding	NM_001271856
hsa-miR-4429	TAMALIN	protein-coding	NM_001271856
hsa-miR-302c-3p	IGSF9B	protein-coding	NM_001277285
hsa-miR-378e	IGSF9B	protein-coding	NM_001277285
hsa-miR-378e	PES1	protein-coding	NM_001282327
hsa-miR-378g	PES1	protein-coding	NM_001282327
hsa-miR-378e	PES1	protein-coding	NM_001282328
hsa-miR-378g	PES1	protein-coding	NM_001282328
hsa-miR-302c-3p	ZNF2	protein-coding	NM_001282398
hsa-miR-4429	ZNF2	protein-coding	NM_001282398
hsa-miR-302c-3p	NPIPA7	protein-coding	NM_001282507
hsa-miR-378g	NPIPA7	protein-coding	NM_001282507
hsa-miR-378g	OSBP2	protein-coding	NM_001282738
hsa-miR-4429	OSBP2	protein-coding	NM_001282738
hsa-miR-378g	OSBP2	protein-coding	NM_001282739
hsa-miR-4429	OSBP2	protein-coding	NM_001282739
hsa-miR-378g	OSBP2	protein-coding	NM_001282740
hsa-miR-4429	OSBP2	protein-coding	NM_001282740
hsa-miR-378g	OSBP2	protein-coding	NM_001282741
hsa-miR-4429	OSBP2	protein-coding	NM_001282741
hsa-miR-378g	OSBP2	protein-coding	NM_001282742
hsa-miR-4429	OSBP2	protein-coding	NM_001282742
hsa-miR-362-5p	CARS1	protein-coding	NM_001751
hsa-miR-378e	CARS1	protein-coding	NM_001751
hsa-miR-302c-3p	MMP19	protein-coding	NM_002429
hsa-miR-378e	MMP19	protein-coding	NM_002429
hsa-miR-362-5p	MYOG	protein-coding	NM_002479
hsa-miR-378g	MYOG	protein-coding	NM_002479
hsa-miR-362-5p	PRELP	protein-coding	NM_002725
hsa-miR-4429	PRELP	protein-coding	NM_002725
hsa-miR-378e	PRSS8	protein-coding	NM_002773
hsa-miR-378g	PRSS8	protein-coding	NM_002773
hsa-miR-378e	PSMC3	protein-coding	NM_002804
hsa-miR-378g	PSMC3	protein-coding	NM_002804
hsa-miR-378e	PTMS	protein-coding	NM_002824
hsa-miR-378g	PTMS	protein-coding	NM_002824
hsa-miR-378e	RAP1GAP	protein-coding	NM_002885
hsa-miR-378g	RAP1GAP	protein-coding	NM_002885
hsa-miR-378g	RARRES2	protein-coding	NM_002889
hsa-miR-4429	RARRES2	protein-coding	NM_002889
hsa-miR-378g	FOXN1	protein-coding	NM_003593
hsa-miR-4429	FOXN1	protein-coding	NM_003593
hsa-miR-302c-3p	STX10	protein-coding	NM_003765
hsa-miR-378g	STX10	protein-coding	NM_003765
hsa-miR-378e	LDB1	protein-coding	NM_003893
hsa-miR-378g	LDB1	protein-coding	NM_003893
hsa-miR-378e	LGI1	protein-coding	NM_005097
hsa-miR-378g	LGI1	protein-coding	NM_005097
hsa-miR-378e	CRKL	protein-coding	NM_005207
hsa-miR-4429	CRKL	protein-coding	NM_005207
hsa-miR-378e	FFAR2	protein-coding	NM_005306
hsa-miR-378g	FFAR2	protein-coding	NM_005306
hsa-miR-378e	LIMK2	protein-coding	NM_005569
hsa-miR-378g	LIMK2	protein-coding	NM_005569
hsa-miR-362-5p	USH1C	protein-coding	NM_005709
hsa-miR-378g	USH1C	protein-coding	NM_005709
hsa-miR-302c-3p	DCAF7	protein-coding	NM_005828
hsa-miR-378g	DCAF7	protein-coding	NM_005828
hsa-miR-302c-3p	LANCL1	protein-coding	NM_006055
hsa-miR-378e	LANCL1	protein-coding	NM_006055
hsa-miR-302c-3p	HLA-DMA	protein-coding	NM_006120
hsa-miR-378g	HLA-DMA	protein-coding	NM_006120
hsa-miR-362-5p	SERPINA4	protein-coding	NM_006215
hsa-miR-378g	SERPINA4	protein-coding	NM_006215
hsa-miR-302c-3p	MAD2L2	protein-coding	NM_006341
hsa-miR-378g	MAD2L2	protein-coding	NM_006341
hsa-miR-378g	DPYSL4	protein-coding	NM_006426
hsa-miR-4429	DPYSL4	protein-coding	NM_006426
hsa-miR-378e	PRPF8	protein-coding	NM_006445
hsa-miR-378g	PRPF8	protein-coding	NM_006445
hsa-miR-378e	MAN2C1	protein-coding	NM_006715
hsa-miR-378g	MAN2C1	protein-coding	NM_006715
hsa-miR-378e	HRH3	protein-coding	NM_007232
hsa-miR-378g	HRH3	protein-coding	NM_007232
hsa-miR-378e	LMOD1	protein-coding	NM_012134
hsa-miR-4429	LMOD1	protein-coding	NM_012134
hsa-miR-302c-3p	TIMM13	protein-coding	NM_012458
hsa-miR-378e	TIMM13	protein-coding	NM_012458
hsa-miR-362-5p	GMPPA	protein-coding	NM_013335
hsa-miR-378g	GMPPA	protein-coding	NM_013335
hsa-miR-378e	PES1	protein-coding	NM_014303
hsa-miR-378g	PES1	protein-coding	NM_014303
hsa-miR-378e	LYPD3	protein-coding	NM_014400
hsa-miR-378g	LYPD3	protein-coding	NM_014400
hsa-miR-378e	ACAP1	protein-coding	NM_014716
hsa-miR-378g	ACAP1	protein-coding	NM_014716
hsa-miR-378e	MAPK8IP3	protein-coding	NM_015133
hsa-miR-4429	MAPK8IP3	protein-coding	NM_015133
hsa-miR-378g	VPS8	protein-coding	NM_015303
hsa-miR-4429	VPS8	protein-coding	NM_015303
hsa-miR-378g	NOL11	protein-coding	NM_015462
hsa-miR-4429	NOL11	protein-coding	NM_015462
hsa-miR-362-5p	DNAH1	protein-coding	NM_015512
hsa-miR-378g	DNAH1	protein-coding	NM_015512
hsa-miR-378e	LIMK2	protein-coding	NM_016733
hsa-miR-378g	LIMK2	protein-coding	NM_016733
hsa-miR-378e	SLC2A6	protein-coding	NM_017585
hsa-miR-4429	SLC2A6	protein-coding	NM_017585
hsa-miR-302c-3p	GIMAP5	protein-coding	NM_018384
hsa-miR-4429	GIMAP5	protein-coding	NM_018384
hsa-miR-378e	ELAC1	protein-coding	NM_018696
hsa-miR-4429	ELAC1	protein-coding	NM_018696
hsa-miR-362-5p	GPR173	protein-coding	NM_018969
hsa-miR-378g	GPR173	protein-coding	NM_018969
hsa-miR-302c-3p	ZNF2	protein-coding	NM_021088
hsa-miR-4429	ZNF2	protein-coding	NM_021088
hsa-miR-378e	FADS3	protein-coding	NM_021727
hsa-miR-378g	FADS3	protein-coding	NM_021727
hsa-miR-362-5p	OTX2	protein-coding	NM_021728
hsa-miR-378g	OTX2	protein-coding	NM_021728
hsa-miR-362-5p	CHAC1	protein-coding	NM_024111
hsa-miR-378g	CHAC1	protein-coding	NM_024111
hsa-miR-378e	NEIL1	protein-coding	NM_024608
hsa-miR-378g	NEIL1	protein-coding	NM_024608
hsa-miR-378e	NAT10	protein-coding	NM_024662
hsa-miR-4429	NAT10	protein-coding	NM_024662
hsa-miR-378e	GIMAP6	protein-coding	NM_024711
hsa-miR-378g	GIMAP6	protein-coding	NM_024711
hsa-miR-378e	TREML2	protein-coding	NM_024807
hsa-miR-378g	TREML2	protein-coding	NM_024807
hsa-miR-4429	TREML2	protein-coding	NM_024807
hsa-miR-362-5p	HID1	protein-coding	NM_030630
hsa-miR-378e	HID1	protein-coding	NM_030630
hsa-miR-378g	OSBP2	protein-coding	NM_030758
hsa-miR-4429	OSBP2	protein-coding	NM_030758
hsa-miR-302c-3p	ADAMTS12	protein-coding	NM_030955
hsa-miR-378g	ADAMTS12	protein-coding	NM_030955
hsa-miR-378e	NECAB3	protein-coding	NM_031231
hsa-miR-378g	NECAB3	protein-coding	NM_031231
hsa-miR-378e	NECAB3	protein-coding	NM_031232
hsa-miR-378g	NECAB3	protein-coding	NM_031232
hsa-miR-378e	ZMIZ2	protein-coding	NM_031449
hsa-miR-378g	ZMIZ2	protein-coding	NM_031449
hsa-miR-302c-3p	REG4	protein-coding	NM_032044
hsa-miR-362-5p	REG4	protein-coding	NM_032044
hsa-miR-378e	KAT8	protein-coding	NM_032188
hsa-miR-378g	KAT8	protein-coding	NM_032188
hsa-miR-378g	OSCAR	protein-coding	NM_130771
hsa-miR-4429	OSCAR	protein-coding	NM_130771
hsa-miR-378g	OSCAR	protein-coding	NM_133168
hsa-miR-4429	OSCAR	protein-coding	NM_133168
hsa-miR-378g	OSCAR	protein-coding	NM_133169
hsa-miR-4429	OSCAR	protein-coding	NM_133169
hsa-miR-378e	GIPC3	protein-coding	NM_133261
hsa-miR-378g	GIPC3	protein-coding	NM_133261
hsa-miR-378e	G6PC3	protein-coding	NM_138387
hsa-miR-378g	G6PC3	protein-coding	NM_138387
hsa-miR-378e	TEX261	protein-coding	NM_144582
hsa-miR-378g	TEX261	protein-coding	NM_144582
hsa-miR-378g	SCARF1	protein-coding	NM_145350
hsa-miR-4429	SCARF1	protein-coding	NM_145350
hsa-miR-378g	GREB1	protein-coding	NM_148903
hsa-miR-4429	GREB1	protein-coding	NM_148903
hsa-miR-378g	MANEAL	protein-coding	NM_152496
hsa-miR-4429	MANEAL	protein-coding	NM_152496
hsa-miR-302c-3p	C4orf45	protein-coding	NM_152543
hsa-miR-4429	C4orf45	protein-coding	NM_152543
hsa-miR-302c-3p	TBATA	protein-coding	NM_152710
hsa-miR-4429	TBATA	protein-coding	NM_152710
hsa-miR-362-5p	USH1C	protein-coding	NM_153676
hsa-miR-378g	USH1C	protein-coding	NM_153676
hsa-miR-378e	TAC4	protein-coding	NM_170685
hsa-miR-378g	TAC4	protein-coding	NM_170685
hsa-miR-378e	MRPL11	protein-coding	NM_170739
hsa-miR-378g	MRPL11	protein-coding	NM_170739
hsa-miR-362-5p	OTX2	protein-coding	NM_172337
hsa-miR-378g	OTX2	protein-coding	NM_172337
hsa-miR-302c-3p	KRT78	protein-coding	NM_173352
hsa-miR-362-5p	KRT78	protein-coding	NM_173352
hsa-miR-378e	ARL10	protein-coding	NM_173664
hsa-miR-378g	ARL10	protein-coding	NM_173664
hsa-miR-378e	ZMIZ2	protein-coding	NM_174929
hsa-miR-378g	ZMIZ2	protein-coding	NM_174929
hsa-miR-378e	WFIKKN2	protein-coding	NM_175575
hsa-miR-378g	WFIKKN2	protein-coding	NM_175575
hsa-miR-378e	BBS7	protein-coding	NM_176824
hsa-miR-4429	BBS7	protein-coding	NM_176824
hsa-miR-378g	NR2C2AP	protein-coding	NM_176880
hsa-miR-4429	NR2C2AP	protein-coding	NM_176880
hsa-miR-378e	BCDIN3D	protein-coding	NM_181708
hsa-miR-378g	BCDIN3D	protein-coding	NM_181708
hsa-miR-378g	TAMALIN	protein-coding	NM_181711
hsa-miR-4429	TAMALIN	protein-coding	NM_181711
hsa-miR-378e	KAT8	protein-coding	NM_182958
hsa-miR-378g	KAT8	protein-coding	NM_182958
hsa-miR-302c-3p	TMPRSS9	protein-coding	NM_182973
hsa-miR-378e	TMPRSS9	protein-coding	NM_182973
hsa-miR-302c-3p	BCAN	protein-coding	NM_198427
hsa-miR-378e	BCAN	protein-coding	NM_198427
hsa-miR-378e	SPATA21	protein-coding	NM_198546
hsa-miR-378g	SPATA21	protein-coding	NM_198546
hsa-miR-378g	SIAH3	protein-coding	NM_198849
hsa-miR-4429	SIAH3	protein-coding	NM_198849
hsa-miR-362-5p	PRELP	protein-coding	NM_201348
hsa-miR-4429	PRELP	protein-coding	NM_201348
hsa-miR-362-5p	GMPPA	protein-coding	NM_205847
hsa-miR-378g	GMPPA	protein-coding	NM_205847
hsa-miR-378g	FAM83A	protein-coding	NM_207006
hsa-miR-4429	FAM83A	protein-coding	NM_207006
hsa-miR-302c-3p	ZNF474	protein-coding	NM_207317
hsa-miR-362-5p	ZNF474	protein-coding	NM_207317
hsa-miR-302c-3p	ZP1	protein-coding	NM_207341
hsa-miR-378g	ZP1	protein-coding	NM_207341
hsa-miR-362-5p	GTF2IP1	non-coding	NR_002206
hsa-miR-378g	GTF2IP1	non-coding	NR_002206
hsa-miR-378e	AQP7P1	non-coding	NR_002817
hsa-miR-378g	AQP7P1	non-coding	NR_002817
hsa-miR-362-5p	GTF2IP4	non-coding	NR_003580
hsa-miR-378g	GTF2IP4	non-coding	NR_003580
hsa-miR-362-5p	PMS2P1	non-coding	NR_003613
hsa-miR-378g	PMS2P1	non-coding	NR_003613
hsa-miR-302c-3p	LAMTOR3	non-coding	NR_024170
hsa-miR-378g	LAMTOR3	non-coding	NR_024170
hsa-miR-378e	LINC00113	non-coding	NR_024357
hsa-miR-4429	LINC00113	non-coding	NR_024357
hsa-miR-302c-3p	FAM226B	non-coding	NR_026594
hsa-miR-378e	FAM226B	non-coding	NR_026594
hsa-miR-302c-3p	FAM226A	non-coding	NR_026595
hsa-miR-378e	FAM226A	non-coding	NR_026595
hsa-miR-378e	CD209	non-coding	NR_026692
hsa-miR-4429	CD209	non-coding	NR_026692
hsa-miR-378g	LINC01124	non-coding	NR_027433
hsa-miR-4429	LINC01124	non-coding	NR_027433
hsa-miR-362-5p	PMS2P5	non-coding	NR_027776
hsa-miR-378g	PMS2P5	non-coding	NR_027776
hsa-miR-362-5p	TIMM8B	non-coding	NR_028383
hsa-miR-378g	TIMM8B	non-coding	NR_028383
hsa-miR-378e	G6PC3	non-coding	NR_028581
hsa-miR-378g	G6PC3	non-coding	NR_028581
hsa-miR-378e	G6PC3	non-coding	NR_028582
hsa-miR-378g	G6PC3	non-coding	NR_028582
hsa-miR-378e	MIR223	non-coding	NR_029637
hsa-miR-378g	MIR223	non-coding	NR_029637
hsa-miR-378g	MIR138-2	non-coding	NR_029680
hsa-miR-4429	MIR138-2	non-coding	NR_029680
hsa-miR-378e	MIR320A	non-coding	NR_029714
hsa-miR-4429	MIR320A	non-coding	NR_029714
hsa-miR-378e	MIR196B	non-coding	NR_029911
hsa-miR-378g	MIR196B	non-coding	NR_029911
hsa-miR-378g	MIR512-1	non-coding	NR_030180
hsa-miR-4429	MIR512-1	non-coding	NR_030180
hsa-miR-378g	MIR512-2	non-coding	NR_030181
hsa-miR-4429	MIR512-2	non-coding	NR_030181
hsa-miR-362-5p	MIR487B	non-coding	NR_030267
hsa-miR-378g	MIR487B	non-coding	NR_030267
hsa-miR-302c-3p	MIR708	non-coding	NR_030598
hsa-miR-378e	MIR708	non-coding	NR_030598
hsa-miR-302c-3p	MIR1207	non-coding	NR_031612
hsa-miR-4429	MIR1207	non-coding	NR_031612
hsa-miR-302c-3p	MIR3147	non-coding	NR_036102
hsa-miR-378g	MIR3147	non-coding	NR_036102
hsa-miR-378e	NPEPPSP1	non-coding	NR_036750
hsa-miR-378g	NPEPPSP1	non-coding	NR_036750
hsa-miR-378e	LOC100507156	non-coding	NR_038323
hsa-miR-378g	LOC100507156	non-coding	NR_038323
hsa-miR-378g	TBX5-AS1	non-coding	NR_038440
hsa-miR-4429	TBX5-AS1	non-coding	NR_038440
hsa-miR-378g	MIR4429	non-coding	NR_039627
hsa-miR-4429	MIR4429	non-coding	NR_039627
hsa-miR-378e	MIR4635	non-coding	NR_039778
hsa-miR-378g	MIR4635	non-coding	NR_039778
hsa-miR-4429	MIR4635	non-coding	NR_039778
hsa-miR-362-5p	SLC52A2	non-coding	NR_045600
hsa-miR-378g	SLC52A2	non-coding	NR_045600
hsa-miR-302c-3p	NEIL1	non-coding	NR_046311
hsa-miR-378e	NEIL1	non-coding	NR_046311
hsa-miR-378g	NEIL1	non-coding	NR_046311
hsa-miR-378e	ATP8B3	non-coding	NR_047593
hsa-miR-378g	ATP8B3	non-coding	NR_047593
hsa-miR-378e	FAM95C	non-coding	NR_047651
hsa-miR-378g	FAM95C	non-coding	NR_047651
hsa-miR-378g	F7	non-coding	NR_051961
hsa-miR-4429	F7	non-coding	NR_051961
hsa-miR-378e	NBAS	non-coding	NR_052013
hsa-miR-378g	NBAS	non-coding	NR_052013
hsa-miR-378g	CDK2AP2	non-coding	NR_073484
hsa-miR-4429	CDK2AP2	non-coding	NR_073484
hsa-miR-378e	SZRD1	non-coding	NR_073500
hsa-miR-378g	SZRD1	non-coding	NR_073500
hsa-miR-378e	SZRD1	non-coding	NR_073501
hsa-miR-378g	SZRD1	non-coding	NR_073501
hsa-miR-378e	SZRD1	non-coding	NR_073502
hsa-miR-378g	SZRD1	non-coding	NR_073502
hsa-miR-378e	SZRD1	non-coding	NR_073503
hsa-miR-378g	SZRD1	non-coding	NR_073503
hsa-miR-362-5p	MLPH	non-coding	NR_104019
hsa-miR-378g	MLPH	non-coding	NR_104019
hsa-miR-378g	SLC2A11	non-coding	NR_104248
hsa-miR-4429	SLC2A11	non-coding	NR_104248
hsa-miR-302c-3p	TBC1D22A	non-coding	NR_104292
hsa-miR-4429	TBC1D22A	non-coding	NR_104292
hsa-miR-378g	CRB2	non-coding	NR_104603
hsa-miR-4429	CRB2	non-coding	NR_104603
hsa-miR-362-5p	MIR6749	non-coding	NR_106807
hsa-miR-378g	MIR6749	non-coding	NR_106807
hsa-miR-378e	CFAP58-DT	non-coding	NR_108036
hsa-miR-4429	CFAP58-DT	non-coding	NR_108036

## Sheet: Group2
miRNA	Target	Type	Annotation			hsa-miR-187-3p
hsa-miR-362-5p	FAS	protein-coding	NM_000043			hsa-miR-3127-5p
hsa-miR-6855-5p	FAS	protein-coding	NM_000043			hsa-miR-362-5p
hsa-miR-6741-5p	FUT1	protein-coding	NM_000148			hsa-miR-6741-5p
hsa-miR-6855-5p	FUT1	protein-coding	NM_000148			hsa-miR-6855-5p
hsa-miR-3127-5p	GUCY2D	protein-coding	NM_000180			hsa-miR-708-3p
hsa-miR-6855-5p	GUCY2D	protein-coding	NM_000180
hsa-miR-187-3p	RS1	protein-coding	NM_000330
hsa-miR-3127-5p	RS1	protein-coding	NM_000330
hsa-miR-3127-5p	ATXN1	protein-coding	NM_000332
hsa-miR-6855-5p	ATXN1	protein-coding	NM_000332
hsa-miR-6741-5p	STAR	protein-coding	NM_000349
hsa-miR-6855-5p	STAR	protein-coding	NM_000349
hsa-miR-3127-5p	TCN2	protein-coding	NM_000355
hsa-miR-6741-5p	TCN2	protein-coding	NM_000355
hsa-miR-3127-5p	ALPL	protein-coding	NM_000478
hsa-miR-6741-5p	ALPL	protein-coding	NM_000478
hsa-miR-3127-5p	CYP7A1	protein-coding	NM_000780
hsa-miR-6855-5p	CYP7A1	protein-coding	NM_000780
hsa-miR-3127-5p	DRD2	protein-coding	NM_000795
hsa-miR-362-5p	DRD2	protein-coding	NM_000795
hsa-miR-187-3p	HRH1	protein-coding	NM_000861
hsa-miR-6855-5p	HRH1	protein-coding	NM_000861
hsa-miR-6741-5p	TSR3	protein-coding	NM_001001410
hsa-miR-6855-5p	TSR3	protein-coding	NM_001001410
hsa-miR-3127-5p	PDE9A	protein-coding	NM_001001567
hsa-miR-6741-5p	PDE9A	protein-coding	NM_001001567
hsa-miR-3127-5p	PDE9A	protein-coding	NM_001001568
hsa-miR-6741-5p	PDE9A	protein-coding	NM_001001568
hsa-miR-3127-5p	PDE9A	protein-coding	NM_001001569
hsa-miR-6741-5p	PDE9A	protein-coding	NM_001001569
hsa-miR-3127-5p	PDE9A	protein-coding	NM_001001570
hsa-miR-6741-5p	PDE9A	protein-coding	NM_001001570
hsa-miR-3127-5p	PDE9A	protein-coding	NM_001001571
hsa-miR-6741-5p	PDE9A	protein-coding	NM_001001571
hsa-miR-3127-5p	PDE9A	protein-coding	NM_001001572
hsa-miR-6741-5p	PDE9A	protein-coding	NM_001001572
hsa-miR-3127-5p	PDE9A	protein-coding	NM_001001573
hsa-miR-6741-5p	PDE9A	protein-coding	NM_001001573
hsa-miR-3127-5p	PDE9A	protein-coding	NM_001001574
hsa-miR-6741-5p	PDE9A	protein-coding	NM_001001574
hsa-miR-3127-5p	PDE9A	protein-coding	NM_001001575
hsa-miR-6741-5p	PDE9A	protein-coding	NM_001001575
hsa-miR-3127-5p	PDE9A	protein-coding	NM_001001576
hsa-miR-6741-5p	PDE9A	protein-coding	NM_001001576
hsa-miR-3127-5p	PDE9A	protein-coding	NM_001001577
hsa-miR-6741-5p	PDE9A	protein-coding	NM_001001577
hsa-miR-3127-5p	PDE9A	protein-coding	NM_001001578
hsa-miR-6741-5p	PDE9A	protein-coding	NM_001001578
hsa-miR-3127-5p	PDE9A	protein-coding	NM_001001579
hsa-miR-6741-5p	PDE9A	protein-coding	NM_001001579
hsa-miR-3127-5p	PDE9A	protein-coding	NM_001001580
hsa-miR-6741-5p	PDE9A	protein-coding	NM_001001580
hsa-miR-3127-5p	PDE9A	protein-coding	NM_001001581
hsa-miR-6741-5p	PDE9A	protein-coding	NM_001001581
hsa-miR-3127-5p	PDE9A	protein-coding	NM_001001582
hsa-miR-6741-5p	PDE9A	protein-coding	NM_001001582
hsa-miR-3127-5p	PDE9A	protein-coding	NM_001001583
hsa-miR-6741-5p	PDE9A	protein-coding	NM_001001583
hsa-miR-3127-5p	PDE9A	protein-coding	NM_001001584
hsa-miR-6741-5p	PDE9A	protein-coding	NM_001001584
hsa-miR-3127-5p	PDE9A	protein-coding	NM_001001585
hsa-miR-6741-5p	PDE9A	protein-coding	NM_001001585
hsa-miR-6741-5p	RAET1G	protein-coding	NM_001001788
hsa-miR-6855-5p	RAET1G	protein-coding	NM_001001788
hsa-miR-3127-5p	PIM3	protein-coding	NM_001001852
hsa-miR-6855-5p	PIM3	protein-coding	NM_001001852
hsa-miR-187-3p	METRNL	protein-coding	NM_001004431
hsa-miR-6855-5p	METRNL	protein-coding	NM_001004431
hsa-miR-187-3p	TAFA3	protein-coding	NM_001004440
hsa-miR-6741-5p	TAFA3	protein-coding	NM_001004440
hsa-miR-362-5p	OR6T1	protein-coding	NM_001005187
hsa-miR-708-3p	OR6T1	protein-coding	NM_001005187
hsa-miR-187-3p	NFASC	protein-coding	NM_001005389
hsa-miR-6741-5p	NFASC	protein-coding	NM_001005389
hsa-miR-6741-5p	DUSP13	protein-coding	NM_001007272
hsa-miR-6855-5p	DUSP13	protein-coding	NM_001007272
hsa-miR-6741-5p	DUSP13	protein-coding	NM_001007273
hsa-miR-6855-5p	DUSP13	protein-coding	NM_001007273
hsa-miR-3127-5p	HES5	protein-coding	NM_001010926
hsa-miR-6741-5p	HES5	protein-coding	NM_001010926
hsa-miR-3127-5p	CCDC189	protein-coding	NM_001014979
hsa-miR-6741-5p	CCDC189	protein-coding	NM_001014979
hsa-miR-6855-5p	CCDC189	protein-coding	NM_001014979
hsa-miR-3127-5p	LLGL2	protein-coding	NM_001015002
hsa-miR-6855-5p	LLGL2	protein-coding	NM_001015002
hsa-miR-187-3p	CYB561	protein-coding	NM_001017916
hsa-miR-6741-5p	CYB561	protein-coding	NM_001017916
hsa-miR-187-3p	CYB561	protein-coding	NM_001017917
hsa-miR-6741-5p	CYB561	protein-coding	NM_001017917
hsa-miR-3127-5p	H2AB1	protein-coding	NM_001017990
hsa-miR-6855-5p	H2AB1	protein-coding	NM_001017990
hsa-miR-3127-5p	H2AB2	protein-coding	NM_001017991
hsa-miR-6855-5p	H2AB2	protein-coding	NM_001017991
hsa-miR-362-5p	KIR2DL5B	protein-coding	NM_001018081
hsa-miR-6855-5p	KIR2DL5B	protein-coding	NM_001018081
hsa-miR-3127-5p	MYADM	protein-coding	NM_001020818
hsa-miR-6741-5p	MYADM	protein-coding	NM_001020818
hsa-miR-3127-5p	MYADM	protein-coding	NM_001020819
hsa-miR-6741-5p	MYADM	protein-coding	NM_001020819
hsa-miR-3127-5p	MYADM	protein-coding	NM_001020820
hsa-miR-6741-5p	MYADM	protein-coding	NM_001020820
hsa-miR-3127-5p	MYADM	protein-coding	NM_001020821
hsa-miR-6741-5p	MYADM	protein-coding	NM_001020821
hsa-miR-6741-5p	SPTB	protein-coding	NM_001024858
hsa-miR-6855-5p	SPTB	protein-coding	NM_001024858
hsa-miR-6741-5p	PCARE	protein-coding	NM_001029883
hsa-miR-6855-5p	PCARE	protein-coding	NM_001029883
hsa-miR-3127-5p	MANEAL	protein-coding	NM_001031740
hsa-miR-6741-5p	MANEAL	protein-coding	NM_001031740
hsa-miR-3127-5p	SSX4B	protein-coding	NM_001034832
hsa-miR-6855-5p	SSX4B	protein-coding	NM_001034832
hsa-miR-6741-5p	PNCK	protein-coding	NM_001039582
hsa-miR-6855-5p	PNCK	protein-coding	NM_001039582
hsa-miR-3127-5p	ANKRD34A	protein-coding	NM_001039888
hsa-miR-6741-5p	ANKRD34A	protein-coding	NM_001039888
hsa-miR-6855-5p	ANKRD34A	protein-coding	NM_001039888
hsa-miR-362-5p	ARAP1	protein-coding	NM_001040118
hsa-miR-6855-5p	ARAP1	protein-coding	NM_001040118
hsa-miR-3127-5p	HSF4	protein-coding	NM_001040667
hsa-miR-6741-5p	HSF4	protein-coding	NM_001040667
hsa-miR-3127-5p	FAM228A	protein-coding	NM_001040710
hsa-miR-6741-5p	FAM228A	protein-coding	NM_001040710
hsa-miR-6741-5p	PGP	protein-coding	NM_001042371
hsa-miR-6855-5p	PGP	protein-coding	NM_001042371
hsa-miR-187-3p	PSAP	protein-coding	NM_001042465
hsa-miR-6855-5p	PSAP	protein-coding	NM_001042465
hsa-miR-187-3p	PSAP	protein-coding	NM_001042466
hsa-miR-6855-5p	PSAP	protein-coding	NM_001042466
hsa-miR-3127-5p	RHOC	protein-coding	NM_001042678
hsa-miR-6741-5p	RHOC	protein-coding	NM_001042678
hsa-miR-3127-5p	RHOC	protein-coding	NM_001042679
hsa-miR-6741-5p	RHOC	protein-coding	NM_001042679
hsa-miR-6741-5p	MUC1	protein-coding	NM_001044393
hsa-miR-6855-5p	MUC1	protein-coding	NM_001044393
hsa-miR-3127-5p	SLA	protein-coding	NM_001045556
hsa-miR-6741-5p	SLA	protein-coding	NM_001045556
hsa-miR-3127-5p	SLA	protein-coding	NM_001045557
hsa-miR-6741-5p	SLA	protein-coding	NM_001045557
hsa-miR-187-3p	KIR2DL4	protein-coding	NM_001080770
hsa-miR-362-5p	KIR2DL4	protein-coding	NM_001080770
hsa-miR-3127-5p	SFTPA1	protein-coding	NM_001093770
hsa-miR-6855-5p	SFTPA1	protein-coding	NM_001093770
hsa-miR-187-3p	TMEM184A	protein-coding	NM_001097620
hsa-miR-3127-5p	TMEM184A	protein-coding	NM_001097620
hsa-miR-187-3p	HRH1	protein-coding	NM_001098211
hsa-miR-6855-5p	HRH1	protein-coding	NM_001098211
hsa-miR-187-3p	HRH1	protein-coding	NM_001098212
hsa-miR-6855-5p	HRH1	protein-coding	NM_001098212
hsa-miR-187-3p	HRH1	protein-coding	NM_001098213
hsa-miR-6855-5p	HRH1	protein-coding	NM_001098213
hsa-miR-187-3p	BET1L	protein-coding	NM_001098787
hsa-miR-6741-5p	BET1L	protein-coding	NM_001098787
hsa-miR-6741-5p	ZNF862	protein-coding	NM_001099220
hsa-miR-6855-5p	ZNF862	protein-coding	NM_001099220
hsa-miR-3127-5p	PHYHIP	protein-coding	NM_001099335
hsa-miR-6855-5p	PHYHIP	protein-coding	NM_001099335
hsa-miR-3127-5p	ADCYAP1	protein-coding	NM_001099733
hsa-miR-362-5p	ADCYAP1	protein-coding	NM_001099733
hsa-miR-3127-5p	XRCC3	protein-coding	NM_001100118
hsa-miR-6855-5p	XRCC3	protein-coding	NM_001100118
hsa-miR-3127-5p	XRCC3	protein-coding	NM_001100119
hsa-miR-6855-5p	XRCC3	protein-coding	NM_001100119
hsa-miR-187-3p	FOXP3	protein-coding	NM_001114377
hsa-miR-3127-5p	FOXP3	protein-coding	NM_001114377
hsa-miR-3127-5p	ADCYAP1	protein-coding	NM_001117
hsa-miR-362-5p	ADCYAP1	protein-coding	NM_001117
hsa-miR-6741-5p	ADD1	protein-coding	NM_001119
hsa-miR-6855-5p	ADD1	protein-coding	NM_001119
hsa-miR-3127-5p	SH3BP2	protein-coding	NM_001122681
hsa-miR-6855-5p	SH3BP2	protein-coding	NM_001122681
hsa-miR-6741-5p	CD99	protein-coding	NM_001122898
hsa-miR-6855-5p	CD99	protein-coding	NM_001122898
hsa-miR-3127-5p	ALPL	protein-coding	NM_001127501
hsa-miR-6741-5p	ALPL	protein-coding	NM_001127501
hsa-miR-3127-5p	ATXN1	protein-coding	NM_001128164
hsa-miR-6855-5p	ATXN1	protein-coding	NM_001128164
hsa-miR-6741-5p	FBLN7	protein-coding	NM_001128165
hsa-miR-6855-5p	FBLN7	protein-coding	NM_001128165
hsa-miR-362-5p	PAK1	protein-coding	NM_001128620
hsa-miR-6855-5p	PAK1	protein-coding	NM_001128620
hsa-miR-3127-5p	PRR22	protein-coding	NM_001134316
hsa-miR-6741-5p	PRR22	protein-coding	NM_001134316
hsa-miR-3127-5p	JDP2	protein-coding	NM_001135047
hsa-miR-6741-5p	JDP2	protein-coding	NM_001135047
hsa-miR-3127-5p	JDP2	protein-coding	NM_001135048
hsa-miR-6741-5p	JDP2	protein-coding	NM_001135048
hsa-miR-3127-5p	JDP2	protein-coding	NM_001135049
hsa-miR-6741-5p	JDP2	protein-coding	NM_001135049
hsa-miR-362-5p	ARAP1	protein-coding	NM_001135190
hsa-miR-6855-5p	ARAP1	protein-coding	NM_001135190
hsa-miR-6741-5p	PNCK	protein-coding	NM_001135740
hsa-miR-6855-5p	PNCK	protein-coding	NM_001135740
hsa-miR-3127-5p	CFAP97D1	protein-coding	NM_001136483
hsa-miR-6855-5p	CFAP97D1	protein-coding	NM_001136483
hsa-miR-3127-5p	C4orf48	protein-coding	NM_001141936
hsa-miR-6741-5p	C4orf48	protein-coding	NM_001141936
hsa-miR-362-5p	CHAC1	protein-coding	NM_001142776
hsa-miR-6855-5p	CHAC1	protein-coding	NM_001142776
hsa-miR-187-3p	NDOR1	protein-coding	NM_001144027
hsa-miR-6741-5p	NDOR1	protein-coding	NM_001144027
hsa-miR-3127-5p	SH3BP2	protein-coding	NM_001145855
hsa-miR-6855-5p	SH3BP2	protein-coding	NM_001145855
hsa-miR-3127-5p	SH3BP2	protein-coding	NM_001145856
hsa-miR-6855-5p	SH3BP2	protein-coding	NM_001145856
hsa-miR-362-5p	REG4	protein-coding	NM_001159352
hsa-miR-6741-5p	REG4	protein-coding	NM_001159352
hsa-miR-362-5p	P2RX6	protein-coding	NM_001159554
hsa-miR-6855-5p	P2RX6	protein-coding	NM_001159554
hsa-miR-187-3p	NFASC	protein-coding	NM_001160333
hsa-miR-6741-5p	NFASC	protein-coding	NM_001160333
hsa-miR-6741-5p	JMJD4	protein-coding	NM_001161465
hsa-miR-6855-5p	JMJD4	protein-coding	NM_001161465
hsa-miR-3127-5p	MYO19	protein-coding	NM_001163735
hsa-miR-6855-5p	MYO19	protein-coding	NM_001163735
hsa-miR-3127-5p	C10orf105	protein-coding	NM_001164375
hsa-miR-6741-5p	C10orf105	protein-coding	NM_001164375
hsa-miR-3127-5p	SSX2B	protein-coding	NM_001164417
hsa-miR-6855-5p	SSX2B	protein-coding	NM_001164417
hsa-miR-3127-5p	MUC12	protein-coding	NM_001164462
hsa-miR-6855-5p	MUC12	protein-coding	NM_001164462
hsa-miR-3127-5p	SFTPA1	protein-coding	NM_001164644
hsa-miR-6855-5p	SFTPA1	protein-coding	NM_001164644
hsa-miR-3127-5p	SFTPA1	protein-coding	NM_001164645
hsa-miR-6855-5p	SFTPA1	protein-coding	NM_001164645
hsa-miR-3127-5p	SFTPA1	protein-coding	NM_001164646
hsa-miR-6855-5p	SFTPA1	protein-coding	NM_001164646
hsa-miR-3127-5p	SFTPA1	protein-coding	NM_001164647
hsa-miR-6855-5p	SFTPA1	protein-coding	NM_001164647
hsa-miR-187-3p	PITPNM3	protein-coding	NM_001165966
hsa-miR-6855-5p	PITPNM3	protein-coding	NM_001165966
hsa-miR-3127-5p	UTP14A	protein-coding	NM_001166221
hsa-miR-362-5p	UTP14A	protein-coding	NM_001166221
hsa-miR-3127-5p	C4orf48	protein-coding	NM_001168243
hsa-miR-6741-5p	C4orf48	protein-coding	NM_001168243
hsa-miR-3127-5p	C10orf105	protein-coding	NM_001168390
hsa-miR-6741-5p	C10orf105	protein-coding	NM_001168390
hsa-miR-3127-5p	KXD1	protein-coding	NM_001171948
hsa-miR-6741-5p	KXD1	protein-coding	NM_001171948
hsa-miR-3127-5p	KXD1	protein-coding	NM_001171949
hsa-miR-6741-5p	KXD1	protein-coding	NM_001171949
hsa-miR-3127-5p	BAG1	protein-coding	NM_001172415
hsa-miR-6741-5p	BAG1	protein-coding	NM_001172415
hsa-miR-187-3p	MYD88	protein-coding	NM_001172566
hsa-miR-3127-5p	MYD88	protein-coding	NM_001172566
hsa-miR-187-3p	MYD88	protein-coding	NM_001172569
hsa-miR-3127-5p	MYD88	protein-coding	NM_001172569
hsa-miR-6741-5p	OLR1	protein-coding	NM_001172632
hsa-miR-6855-5p	OLR1	protein-coding	NM_001172632
hsa-miR-6741-5p	OLR1	protein-coding	NM_001172633
hsa-miR-6855-5p	OLR1	protein-coding	NM_001172633
hsa-miR-3127-5p	DNAI2	protein-coding	NM_001172810
hsa-miR-6741-5p	DNAI2	protein-coding	NM_001172810
hsa-miR-6741-5p	PRRT4	protein-coding	NM_001174164
hsa-miR-6855-5p	PRRT4	protein-coding	NM_001174164
hsa-miR-3127-5p	MSLN	protein-coding	NM_001177355
hsa-miR-6855-5p	MSLN	protein-coding	NM_001177355
hsa-miR-3127-5p	ALPL	protein-coding	NM_001177520
hsa-miR-6741-5p	ALPL	protein-coding	NM_001177520
hsa-miR-6741-5p	SUFU	protein-coding	NM_001178133
hsa-miR-6855-5p	SUFU	protein-coding	NM_001178133
hsa-miR-3127-5p	TCN2	protein-coding	NM_001184726
hsa-miR-6741-5p	TCN2	protein-coding	NM_001184726
hsa-miR-3127-5p	FLAD1	protein-coding	NM_001184891
hsa-miR-6855-5p	FLAD1	protein-coding	NM_001184891
hsa-miR-3127-5p	PACSIN3	protein-coding	NM_001184974
hsa-miR-6855-5p	PACSIN3	protein-coding	NM_001184974
hsa-miR-3127-5p	PACSIN3	protein-coding	NM_001184975
hsa-miR-6855-5p	PACSIN3	protein-coding	NM_001184975
hsa-miR-187-3p	CLDN15	protein-coding	NM_001185080
hsa-miR-3127-5p	CLDN15	protein-coding	NM_001185080
hsa-miR-3127-5p	CES4A	protein-coding	NM_001190201
hsa-miR-6741-5p	CES4A	protein-coding	NM_001190201
hsa-miR-3127-5p	CES4A	protein-coding	NM_001190202
hsa-miR-6741-5p	CES4A	protein-coding	NM_001190202
hsa-miR-3127-5p	NUP62	protein-coding	NM_001193357
hsa-miR-6855-5p	NUP62	protein-coding	NM_001193357
hsa-miR-3127-5p	FOXL3-OT1	protein-coding	NM_001195127
hsa-miR-6855-5p	FOXL3-OT1	protein-coding	NM_001195127
hsa-miR-187-3p	IRF3	protein-coding	NM_001197122
hsa-miR-6741-5p	IRF3	protein-coding	NM_001197122
hsa-miR-187-3p	IRF3	protein-coding	NM_001197123
hsa-miR-6741-5p	IRF3	protein-coding	NM_001197123
hsa-miR-187-3p	IRF3	protein-coding	NM_001197124
hsa-miR-6741-5p	IRF3	protein-coding	NM_001197124
hsa-miR-187-3p	IRF3	protein-coding	NM_001197125
hsa-miR-6741-5p	IRF3	protein-coding	NM_001197125
hsa-miR-187-3p	IRF3	protein-coding	NM_001197126
hsa-miR-6741-5p	IRF3	protein-coding	NM_001197126
hsa-miR-187-3p	IRF3	protein-coding	NM_001197127
hsa-miR-6741-5p	IRF3	protein-coding	NM_001197127
hsa-miR-187-3p	IRF3	protein-coding	NM_001197128
hsa-miR-6741-5p	IRF3	protein-coding	NM_001197128
hsa-miR-3127-5p	BEAN1	protein-coding	NM_001197225
hsa-miR-6741-5p	BEAN1	protein-coding	NM_001197225
hsa-miR-6741-5p	BAIAP3	protein-coding	NM_001199096
hsa-miR-6855-5p	BAIAP3	protein-coding	NM_001199096
hsa-miR-6741-5p	BAIAP3	protein-coding	NM_001199097
hsa-miR-6855-5p	BAIAP3	protein-coding	NM_001199097
hsa-miR-6741-5p	BAIAP3	protein-coding	NM_001199098
hsa-miR-6855-5p	BAIAP3	protein-coding	NM_001199098
hsa-miR-6741-5p	BAIAP3	protein-coding	NM_001199099
hsa-miR-6855-5p	BAIAP3	protein-coding	NM_001199099
hsa-miR-3127-5p	PMF1-BGLAP	protein-coding	NM_001199661
hsa-miR-6741-5p	PMF1-BGLAP	protein-coding	NM_001199661
hsa-miR-6855-5p	PMF1-BGLAP	protein-coding	NM_001199661
hsa-miR-3127-5p	PMF1-BGLAP	protein-coding	NM_001199662
hsa-miR-6741-5p	PMF1-BGLAP	protein-coding	NM_001199662
hsa-miR-6855-5p	PMF1-BGLAP	protein-coding	NM_001199662
hsa-miR-3127-5p	PMF1-BGLAP	protein-coding	NM_001199663
hsa-miR-6741-5p	PMF1-BGLAP	protein-coding	NM_001199663
hsa-miR-6855-5p	PMF1-BGLAP	protein-coding	NM_001199663
hsa-miR-3127-5p	PMF1-BGLAP	protein-coding	NM_001199664
hsa-miR-6741-5p	PMF1-BGLAP	protein-coding	NM_001199664
hsa-miR-6855-5p	PMF1-BGLAP	protein-coding	NM_001199664
hsa-miR-6741-5p	DAAM2	protein-coding	NM_001201427
hsa-miR-6855-5p	DAAM2	protein-coding	NM_001201427
hsa-miR-3127-5p	CORO7-PAM16	protein-coding	NM_001201479
hsa-miR-6741-5p	CORO7-PAM16	protein-coding	NM_001201479
hsa-miR-6741-5p	MUC1	protein-coding	NM_001204288
hsa-miR-6855-5p	MUC1	protein-coding	NM_001204288
hsa-miR-6741-5p	MUC1	protein-coding	NM_001204293
hsa-miR-6855-5p	MUC1	protein-coding	NM_001204293
hsa-miR-3127-5p	KCNH2	protein-coding	NM_001204798
hsa-miR-6855-5p	KCNH2	protein-coding	NM_001204798
hsa-miR-3127-5p	RASSF1	protein-coding	NM_001206957
hsa-miR-6741-5p	RASSF1	protein-coding	NM_001206957
hsa-miR-3127-5p	PPP2R2C	protein-coding	NM_001206994
hsa-miR-6855-5p	PPP2R2C	protein-coding	NM_001206994
hsa-miR-3127-5p	PPP2R2C	protein-coding	NM_001206995
hsa-miR-6855-5p	PPP2R2C	protein-coding	NM_001206995
hsa-miR-3127-5p	PPP2R2C	protein-coding	NM_001206996
hsa-miR-6855-5p	PPP2R2C	protein-coding	NM_001206996
hsa-miR-3127-5p	IL31RA	protein-coding	NM_001242636
hsa-miR-6741-5p	IL31RA	protein-coding	NM_001242636
hsa-miR-3127-5p	IL31RA	protein-coding	NM_001242639
hsa-miR-6741-5p	IL31RA	protein-coding	NM_001242639
hsa-miR-362-5p	HINFP	protein-coding	NM_001243259
hsa-miR-6855-5p	HINFP	protein-coding	NM_001243259
hsa-miR-3127-5p	NUB1	protein-coding	NM_001243351
hsa-miR-6741-5p	NUB1	protein-coding	NM_001243351
hsa-miR-3127-5p	FHL3	protein-coding	NM_001243878
hsa-miR-6741-5p	FHL3	protein-coding	NM_001243878
hsa-miR-6741-5p	TRIM3	protein-coding	NM_001248006
hsa-miR-6855-5p	TRIM3	protein-coding	NM_001248006
hsa-miR-6741-5p	TRIM3	protein-coding	NM_001248007
hsa-miR-6855-5p	TRIM3	protein-coding	NM_001248007
hsa-miR-6741-5p	CDH4	protein-coding	NM_001252338
hsa-miR-6855-5p	CDH4	protein-coding	NM_001252338
hsa-miR-6741-5p	CDH4	protein-coding	NM_001252339
hsa-miR-6855-5p	CDH4	protein-coding	NM_001252339
hsa-miR-6855-5p	ATAT1	protein-coding	NM_001254952
hsa-miR-708-3p	ATAT1	protein-coding	NM_001254952
hsa-miR-3127-5p	POLD1	protein-coding	NM_001256849
hsa-miR-6855-5p	POLD1	protein-coding	NM_001256849
hsa-miR-3127-5p	USP17L15	protein-coding	NM_001256894
hsa-miR-6741-5p	USP17L15	protein-coding	NM_001256894
hsa-miR-6855-5p	USP17L15	protein-coding	NM_001256894
hsa-miR-3127-5p	LMNA	protein-coding	NM_001257374
hsa-miR-6741-5p	LMNA	protein-coding	NM_001257374
hsa-miR-187-3p	KIR2DL4	protein-coding	NM_001258383
hsa-miR-362-5p	KIR2DL4	protein-coding	NM_001258383
hsa-miR-362-5p	UEVLD	protein-coding	NM_001261383
hsa-miR-6855-5p	UEVLD	protein-coding	NM_001261383
hsa-miR-362-5p	UEVLD	protein-coding	NM_001261385
hsa-miR-6855-5p	UEVLD	protein-coding	NM_001261385
hsa-miR-362-5p	UEVLD	protein-coding	NM_001261386
hsa-miR-6855-5p	UEVLD	protein-coding	NM_001261386
hsa-miR-6741-5p	SLIRP	protein-coding	NM_001267863
hsa-miR-6855-5p	SLIRP	protein-coding	NM_001267863
hsa-miR-6741-5p	SLIRP	protein-coding	NM_001267864
hsa-miR-6855-5p	SLIRP	protein-coding	NM_001267864
hsa-miR-3127-5p	PTK7	protein-coding	NM_001270398
hsa-miR-6855-5p	PTK7	protein-coding	NM_001270398
hsa-miR-3127-5p	OTX2	protein-coding	NM_001270523
hsa-miR-362-5p	OTX2	protein-coding	NM_001270523
hsa-miR-3127-5p	OTX2	protein-coding	NM_001270524
hsa-miR-362-5p	OTX2	protein-coding	NM_001270524
hsa-miR-3127-5p	OTX2	protein-coding	NM_001270525
hsa-miR-362-5p	OTX2	protein-coding	NM_001270525
hsa-miR-187-3p	NOSIP	protein-coding	NM_001270960
hsa-miR-6741-5p	NOSIP	protein-coding	NM_001270960
hsa-miR-3127-5p	COPZ1	protein-coding	NM_001271734
hsa-miR-6855-5p	COPZ1	protein-coding	NM_001271734
hsa-miR-3127-5p	COPZ1	protein-coding	NM_001271735
hsa-miR-6855-5p	COPZ1	protein-coding	NM_001271735
hsa-miR-3127-5p	COPZ1	protein-coding	NM_001271736
hsa-miR-6855-5p	COPZ1	protein-coding	NM_001271736
hsa-miR-362-5p	CIB2	protein-coding	NM_001271888
hsa-miR-6741-5p	CIB2	protein-coding	NM_001271888
hsa-miR-6855-5p	CIB2	protein-coding	NM_001271888
hsa-miR-362-5p	CIB2	protein-coding	NM_001271889
hsa-miR-6741-5p	CIB2	protein-coding	NM_001271889
hsa-miR-6855-5p	CIB2	protein-coding	NM_001271889
hsa-miR-3127-5p	PAQR6	protein-coding	NM_001272106
hsa-miR-6741-5p	PAQR6	protein-coding	NM_001272106
hsa-miR-6855-5p	PAQR6	protein-coding	NM_001272106
hsa-miR-3127-5p	PAQR6	protein-coding	NM_001272109
hsa-miR-6741-5p	PAQR6	protein-coding	NM_001272109
hsa-miR-6855-5p	PAQR6	protein-coding	NM_001272109
hsa-miR-3127-5p	PAQR6	protein-coding	NM_001272110
hsa-miR-6741-5p	PAQR6	protein-coding	NM_001272110
hsa-miR-6855-5p	PAQR6	protein-coding	NM_001272110
hsa-miR-3127-5p	PAQR6	protein-coding	NM_001272111
hsa-miR-6741-5p	PAQR6	protein-coding	NM_001272111
hsa-miR-6855-5p	PAQR6	protein-coding	NM_001272111
hsa-miR-3127-5p	PAQR6	protein-coding	NM_001272112
hsa-miR-6741-5p	PAQR6	protein-coding	NM_001272112
hsa-miR-6855-5p	PAQR6	protein-coding	NM_001272112
hsa-miR-3127-5p	PAQR6	protein-coding	NM_001272113
hsa-miR-6741-5p	PAQR6	protein-coding	NM_001272113
hsa-miR-6855-5p	PAQR6	protein-coding	NM_001272113
hsa-miR-3127-5p	NISCH	protein-coding	NM_001276293
hsa-miR-6855-5p	NISCH	protein-coding	NM_001276293
hsa-miR-3127-5p	SSX1	protein-coding	NM_001278691
hsa-miR-6855-5p	SSX1	protein-coding	NM_001278691
hsa-miR-3127-5p	SSX2	protein-coding	NM_001278697
hsa-miR-6855-5p	SSX2	protein-coding	NM_001278697
hsa-miR-3127-5p	SSX2B	protein-coding	NM_001278701
hsa-miR-6855-5p	SSX2B	protein-coding	NM_001278701
hsa-miR-3127-5p	SSX2B	protein-coding	NM_001278702
hsa-miR-6855-5p	SSX2B	protein-coding	NM_001278702
hsa-miR-3127-5p	ZNHIT3	protein-coding	NM_001281434
hsa-miR-6855-5p	ZNHIT3	protein-coding	NM_001281434
hsa-miR-3127-5p	TFE3	protein-coding	NM_001282142
hsa-miR-362-5p	TFE3	protein-coding	NM_001282142
hsa-miR-187-3p	PPP1R7	protein-coding	NM_001282409
hsa-miR-362-5p	PPP1R7	protein-coding	NM_001282409
hsa-miR-187-3p	PPP1R7	protein-coding	NM_001282412
hsa-miR-362-5p	PPP1R7	protein-coding	NM_001282412
hsa-miR-187-3p	PPP1R7	protein-coding	NM_001282413
hsa-miR-362-5p	PPP1R7	protein-coding	NM_001282413
hsa-miR-3127-5p	PMPCA	protein-coding	NM_001282944
hsa-miR-6741-5p	PMPCA	protein-coding	NM_001282944
hsa-miR-3127-5p	PMPCA	protein-coding	NM_001282946
hsa-miR-6741-5p	PMPCA	protein-coding	NM_001282946
hsa-miR-3127-5p	SLA	protein-coding	NM_001282964
hsa-miR-6741-5p	SLA	protein-coding	NM_001282964
hsa-miR-3127-5p	SLA	protein-coding	NM_001282965
hsa-miR-6741-5p	SLA	protein-coding	NM_001282965
hsa-miR-3127-5p	WDR86	protein-coding	NM_001284260
hsa-miR-6741-5p	WDR86	protein-coding	NM_001284260
hsa-miR-3127-5p	WDR86	protein-coding	NM_001284261
hsa-miR-6741-5p	WDR86	protein-coding	NM_001284261
hsa-miR-3127-5p	WDR86	protein-coding	NM_001284262
hsa-miR-6741-5p	WDR86	protein-coding	NM_001284262
hsa-miR-6741-5p	BAIAP3	protein-coding	NM_001286464
hsa-miR-6855-5p	BAIAP3	protein-coding	NM_001286464
hsa-miR-3127-5p	NPM2	protein-coding	NM_001286680
hsa-miR-6741-5p	NPM2	protein-coding	NM_001286680
hsa-miR-3127-5p	NPM2	protein-coding	NM_001286681
hsa-miR-6741-5p	NPM2	protein-coding	NM_001286681
hsa-miR-3127-5p	ST6GALNAC6	protein-coding	NM_001286999
hsa-miR-6855-5p	ST6GALNAC6	protein-coding	NM_001286999
hsa-miR-3127-5p	ST6GALNAC6	protein-coding	NM_001287000
hsa-miR-6855-5p	ST6GALNAC6	protein-coding	NM_001287000
hsa-miR-3127-5p	ST6GALNAC6	protein-coding	NM_001287001
hsa-miR-6855-5p	ST6GALNAC6	protein-coding	NM_001287001
hsa-miR-3127-5p	ST6GALNAC6	protein-coding	NM_001287002
hsa-miR-6855-5p	ST6GALNAC6	protein-coding	NM_001287002
hsa-miR-6741-5p	BTNL10	protein-coding	NM_001287262
hsa-miR-6855-5p	BTNL10	protein-coding	NM_001287262
hsa-miR-3127-5p	DIO3	protein-coding	NM_001362
hsa-miR-6741-5p	DIO3	protein-coding	NM_001362
hsa-miR-362-5p	ECH1	protein-coding	NM_001398
hsa-miR-6855-5p	ECH1	protein-coding	NM_001398
hsa-miR-3127-5p	GNRH2	protein-coding	NM_001501
hsa-miR-6741-5p	GNRH2	protein-coding	NM_001501
hsa-miR-3127-5p	HSF4	protein-coding	NM_001538
hsa-miR-6741-5p	HSF4	protein-coding	NM_001538
hsa-miR-187-3p	IRF3	protein-coding	NM_001571
hsa-miR-6741-5p	IRF3	protein-coding	NM_001571
hsa-miR-6741-5p	ALPP	protein-coding	NM_001632
hsa-miR-6855-5p	ALPP	protein-coding	NM_001632
hsa-miR-187-3p	APEH	protein-coding	NM_001640
hsa-miR-6741-5p	APEH	protein-coding	NM_001640
hsa-miR-6855-5p	APEH	protein-coding	NM_001640
hsa-miR-6741-5p	AZU1	protein-coding	NM_001700
hsa-miR-6855-5p	AZU1	protein-coding	NM_001700
hsa-miR-187-3p	ADGRB1	protein-coding	NM_001702
hsa-miR-3127-5p	ADGRB1	protein-coding	NM_001702
hsa-miR-3127-5p	CALB2	protein-coding	NM_001740
hsa-miR-6741-5p	CALB2	protein-coding	NM_001740
hsa-miR-6741-5p	CDH4	protein-coding	NM_001794
hsa-miR-6855-5p	CDH4	protein-coding	NM_001794
hsa-miR-187-3p	CYB561	protein-coding	NM_001915
hsa-miR-6741-5p	CYB561	protein-coding	NM_001915
hsa-miR-6741-5p	GZMK	protein-coding	NM_002104
hsa-miR-6855-5p	GZMK	protein-coding	NM_002104
hsa-miR-187-3p	KIR2DL4	protein-coding	NM_002255
hsa-miR-362-5p	KIR2DL4	protein-coding	NM_002255
hsa-miR-187-3p	MAFK	protein-coding	NM_002360
hsa-miR-3127-5p	MAFK	protein-coding	NM_002360
hsa-miR-3127-5p	ADAM11	protein-coding	NM_002390
hsa-miR-6741-5p	ADAM11	protein-coding	NM_002390
hsa-miR-6741-5p	CD99	protein-coding	NM_002414
hsa-miR-6855-5p	CD99	protein-coding	NM_002414
hsa-miR-6741-5p	NPTX1	protein-coding	NM_002522
hsa-miR-6855-5p	NPTX1	protein-coding	NM_002522
hsa-miR-6741-5p	OLR1	protein-coding	NM_002543
hsa-miR-6855-5p	OLR1	protein-coding	NM_002543
hsa-miR-3127-5p	SLC22A18	protein-coding	NM_002555
hsa-miR-6855-5p	SLC22A18	protein-coding	NM_002555
hsa-miR-362-5p	PAK1	protein-coding	NM_002576
hsa-miR-6855-5p	PAK1	protein-coding	NM_002576
hsa-miR-3127-5p	PDE9A	protein-coding	NM_002606
hsa-miR-6741-5p	PDE9A	protein-coding	NM_002606
hsa-miR-3127-5p	POLD1	protein-coding	NM_002691
hsa-miR-6855-5p	POLD1	protein-coding	NM_002691
hsa-miR-187-3p	PPP1R7	protein-coding	NM_002712
hsa-miR-362-5p	PPP1R7	protein-coding	NM_002712
hsa-miR-187-3p	PSAP	protein-coding	NM_002778
hsa-miR-6855-5p	PSAP	protein-coding	NM_002778
hsa-miR-3127-5p	PTK7	protein-coding	NM_002821
hsa-miR-6855-5p	PTK7	protein-coding	NM_002821
hsa-miR-3127-5p	SECTM1	protein-coding	NM_003004
hsa-miR-6741-5p	SECTM1	protein-coding	NM_003004
hsa-miR-3127-5p	SH3BP2	protein-coding	NM_003023
hsa-miR-6855-5p	SH3BP2	protein-coding	NM_003023
hsa-miR-3127-5p	SSX2	protein-coding	NM_003147
hsa-miR-6855-5p	SSX2	protein-coding	NM_003147
hsa-miR-6741-5p	TEAD4	protein-coding	NM_003213
hsa-miR-6855-5p	TEAD4	protein-coding	NM_003213
hsa-miR-3127-5p	CAMK1	protein-coding	NM_003656
hsa-miR-6855-5p	CAMK1	protein-coding	NM_003656
hsa-miR-3127-5p	STC2	protein-coding	NM_003714
hsa-miR-6741-5p	STC2	protein-coding	NM_003714
hsa-miR-6741-5p	BAIAP3	protein-coding	NM_003933
hsa-miR-6855-5p	BAIAP3	protein-coding	NM_003933
hsa-miR-6741-5p	UBE2M	protein-coding	NM_003969
hsa-miR-6855-5p	UBE2M	protein-coding	NM_003969
hsa-miR-3127-5p	NEURL1	protein-coding	NM_004210
hsa-miR-6741-5p	NEURL1	protein-coding	NM_004210
hsa-miR-6741-5p	RAB11B	protein-coding	NM_004218
hsa-miR-6855-5p	RAB11B	protein-coding	NM_004218
hsa-miR-6741-5p	RECQL4	protein-coding	NM_004260
hsa-miR-6855-5p	RECQL4	protein-coding	NM_004260
hsa-miR-3127-5p	BAG1	protein-coding	NM_004323
hsa-miR-6741-5p	BAG1	protein-coding	NM_004323
hsa-miR-3127-5p	EPHB4	protein-coding	NM_004444
hsa-miR-6741-5p	EPHB4	protein-coding	NM_004444
hsa-miR-6855-5p	EPHB4	protein-coding	NM_004444
hsa-miR-3127-5p	FHL3	protein-coding	NM_004468
hsa-miR-6741-5p	FHL3	protein-coding	NM_004468
hsa-miR-3127-5p	KCNQ2	protein-coding	NM_004518
hsa-miR-6855-5p	KCNQ2	protein-coding	NM_004518
hsa-miR-3127-5p	PEX14	protein-coding	NM_004565
hsa-miR-6855-5p	PEX14	protein-coding	NM_004565
hsa-miR-362-5p	LPAR2	protein-coding	NM_004720
hsa-miR-6741-5p	LPAR2	protein-coding	NM_004720
hsa-miR-3127-5p	ZNHIT3	protein-coding	NM_004773
hsa-miR-6855-5p	ZNHIT3	protein-coding	NM_004773
hsa-miR-187-3p	PEX16	protein-coding	NM_004813
hsa-miR-6855-5p	PEX16	protein-coding	NM_004813
hsa-miR-362-5p	HDAC1	protein-coding	NM_004964
hsa-miR-6855-5p	HDAC1	protein-coding	NM_004964
hsa-miR-708-3p	HDAC1	protein-coding	NM_004964
hsa-miR-6741-5p	PLK1	protein-coding	NM_005030
hsa-miR-6855-5p	PLK1	protein-coding	NM_005030
hsa-miR-187-3p	GSC2	protein-coding	NM_005315
hsa-miR-6855-5p	GSC2	protein-coding	NM_005315
hsa-miR-187-3p	MYCL	protein-coding	NM_005376
hsa-miR-6855-5p	MYCL	protein-coding	NM_005376
hsa-miR-3127-5p	SFTPA1	protein-coding	NM_005411
hsa-miR-6855-5p	SFTPA1	protein-coding	NM_005411
hsa-miR-3127-5p	XRCC3	protein-coding	NM_005432
hsa-miR-6855-5p	XRCC3	protein-coding	NM_005432
hsa-miR-362-5p	P2RX6	protein-coding	NM_005446
hsa-miR-6855-5p	P2RX6	protein-coding	NM_005446
hsa-miR-6741-5p	MDFI	protein-coding	NM_005586
hsa-miR-6855-5p	MDFI	protein-coding	NM_005586
hsa-miR-3127-5p	SSX1	protein-coding	NM_005635
hsa-miR-6855-5p	SSX1	protein-coding	NM_005635
hsa-miR-3127-5p	SSX4	protein-coding	NM_005636
hsa-miR-6855-5p	SSX4	protein-coding	NM_005636
hsa-miR-3127-5p	MSLN	protein-coding	NM_005823
hsa-miR-6855-5p	MSLN	protein-coding	NM_005823
hsa-miR-3127-5p	KATNB1	protein-coding	NM_005886
hsa-miR-6741-5p	KATNB1	protein-coding	NM_005886
hsa-miR-6741-5p	PTK6	protein-coding	NM_005975
hsa-miR-6855-5p	PTK6	protein-coding	NM_005975
hsa-miR-3127-5p	H1-10	protein-coding	NM_006026
hsa-miR-6741-5p	H1-10	protein-coding	NM_006026
hsa-miR-6741-5p	PIAS3	protein-coding	NM_006099
hsa-miR-6855-5p	PIAS3	protein-coding	NM_006099
hsa-miR-362-5p	DAGLA	protein-coding	NM_006133
hsa-miR-6741-5p	DAGLA	protein-coding	NM_006133
hsa-miR-362-5p	CIB2	protein-coding	NM_006383
hsa-miR-6741-5p	CIB2	protein-coding	NM_006383
hsa-miR-6855-5p	CIB2	protein-coding	NM_006383
hsa-miR-6741-5p	TRIM3	protein-coding	NM_006458
hsa-miR-6855-5p	TRIM3	protein-coding	NM_006458
hsa-miR-3127-5p	TFE3	protein-coding	NM_006521
hsa-miR-362-5p	TFE3	protein-coding	NM_006521
hsa-miR-3127-5p	SCGB1D1	protein-coding	NM_006552
hsa-miR-6855-5p	SCGB1D1	protein-coding	NM_006552
hsa-miR-3127-5p	UTP14A	protein-coding	NM_006649
hsa-miR-362-5p	UTP14A	protein-coding	NM_006649
hsa-miR-3127-5p	ACTL7B	protein-coding	NM_006686
hsa-miR-6741-5p	ACTL7B	protein-coding	NM_006686
hsa-miR-3127-5p	SLA	protein-coding	NM_006748
hsa-miR-6741-5p	SLA	protein-coding	NM_006748
hsa-miR-3127-5p	TRH	protein-coding	NM_007117
hsa-miR-6855-5p	TRH	protein-coding	NM_007117
hsa-miR-3127-5p	SF3A2	protein-coding	NM_007165
hsa-miR-6741-5p	SF3A2	protein-coding	NM_007165
hsa-miR-3127-5p	RASSF1	protein-coding	NM_007182
hsa-miR-6741-5p	RASSF1	protein-coding	NM_007182
hsa-miR-187-3p	LTB	protein-coding	NM_009588
hsa-miR-6855-5p	LTB	protein-coding	NM_009588
hsa-miR-3127-5p	TMEM59L	protein-coding	NM_012109
hsa-miR-6855-5p	TMEM59L	protein-coding	NM_012109
hsa-miR-3127-5p	FBXO10	protein-coding	NM_012166
hsa-miR-6741-5p	FBXO10	protein-coding	NM_012166
hsa-miR-3127-5p	FBXO2	protein-coding	NM_012168
hsa-miR-6855-5p	FBXO2	protein-coding	NM_012168
hsa-miR-6741-5p	SNW1	protein-coding	NM_012245
hsa-miR-6855-5p	SNW1	protein-coding	NM_012245
hsa-miR-187-3p	KIR2DS2	protein-coding	NM_012312
hsa-miR-6855-5p	KIR2DS2	protein-coding	NM_012312
hsa-miR-187-3p	KIR2DS3	protein-coding	NM_012313
hsa-miR-6855-5p	KIR2DS3	protein-coding	NM_012313
hsa-miR-187-3p	KIR2DS4	protein-coding	NM_012314
hsa-miR-6855-5p	KIR2DS4	protein-coding	NM_012314
hsa-miR-3127-5p	PLA2G15	protein-coding	NM_012320
hsa-miR-362-5p	PLA2G15	protein-coding	NM_012320
hsa-miR-3127-5p	NUP62	protein-coding	NM_012346
hsa-miR-6855-5p	NUP62	protein-coding	NM_012346
hsa-miR-362-5p	KIR3DL1	protein-coding	NM_013289
hsa-miR-6855-5p	KIR3DL1	protein-coding	NM_013289
hsa-miR-3127-5p	NRBP1	protein-coding	NM_013392
hsa-miR-708-3p	NRBP1	protein-coding	NM_013392
hsa-miR-3127-5p	MSLN	protein-coding	NM_013404
hsa-miR-6855-5p	MSLN	protein-coding	NM_013404
hsa-miR-3127-5p	ST6GALNAC6	protein-coding	NM_013443
hsa-miR-6855-5p	ST6GALNAC6	protein-coding	NM_013443
hsa-miR-187-3p	CCDC22	protein-coding	NM_014008
hsa-miR-3127-5p	CCDC22	protein-coding	NM_014008
hsa-miR-187-3p	FOXP3	protein-coding	NM_014009
hsa-miR-3127-5p	FOXP3	protein-coding	NM_014009
hsa-miR-362-5p	LAT2	protein-coding	NM_014146
hsa-miR-6741-5p	LAT2	protein-coding	NM_014146
hsa-miR-6741-5p	ADD1	protein-coding	NM_014189
hsa-miR-6855-5p	ADD1	protein-coding	NM_014189
hsa-miR-187-3p	KIR2DL1	protein-coding	NM_014218
hsa-miR-362-5p	KIR2DL1	protein-coding	NM_014218
hsa-miR-187-3p	KIR2DL2	protein-coding	NM_014219
hsa-miR-362-5p	KIR2DL2	protein-coding	NM_014219
hsa-miR-187-3p	CLDN15	protein-coding	NM_014343
hsa-miR-3127-5p	CLDN15	protein-coding	NM_014343
hsa-miR-187-3p	KIR2DS1	protein-coding	NM_014512
hsa-miR-6855-5p	KIR2DS1	protein-coding	NM_014512
hsa-miR-187-3p	KIR2DS5	protein-coding	NM_014513
hsa-miR-6855-5p	KIR2DS5	protein-coding	NM_014513
hsa-miR-3127-5p	PHYHIP	protein-coding	NM_014759
hsa-miR-6855-5p	PHYHIP	protein-coding	NM_014759
hsa-miR-3127-5p	PMPCA	protein-coding	NM_015160
hsa-miR-6741-5p	PMPCA	protein-coding	NM_015160
hsa-miR-3127-5p	ATP11A	protein-coding	NM_015205
hsa-miR-6741-5p	ATP11A	protein-coding	NM_015205
hsa-miR-362-5p	ARAP1	protein-coding	NM_015242
hsa-miR-6855-5p	ARAP1	protein-coding	NM_015242
hsa-miR-6741-5p	DAAM2	protein-coding	NM_015345
hsa-miR-6855-5p	DAAM2	protein-coding	NM_015345
hsa-miR-3127-5p	TECPR1	protein-coding	NM_015395
hsa-miR-6741-5p	TECPR1	protein-coding	NM_015395
hsa-miR-362-5p	HINFP	protein-coding	NM_015517
hsa-miR-6855-5p	HINFP	protein-coding	NM_015517
hsa-miR-6741-5p	TKFC	protein-coding	NM_015533
hsa-miR-6855-5p	TKFC	protein-coding	NM_015533
hsa-miR-187-3p	CHD5	protein-coding	NM_015557
hsa-miR-6741-5p	CHD5	protein-coding	NM_015557
hsa-miR-362-5p	RIBC2	protein-coding	NM_015653
hsa-miR-708-3p	RIBC2	protein-coding	NM_015653
hsa-miR-187-3p	KIR2DL3	protein-coding	NM_015868
hsa-miR-362-5p	KIR2DL3	protein-coding	NM_015868
hsa-miR-187-3p	NOSIP	protein-coding	NM_015953
hsa-miR-6741-5p	NOSIP	protein-coding	NM_015953
hsa-miR-3127-5p	ERGIC3	protein-coding	NM_015966
hsa-miR-6855-5p	ERGIC3	protein-coding	NM_015966
hsa-miR-3127-5p	COPZ1	protein-coding	NM_016057
hsa-miR-6855-5p	COPZ1	protein-coding	NM_016057
hsa-miR-3127-5p	PAM16	protein-coding	NM_016069
hsa-miR-6741-5p	PAM16	protein-coding	NM_016069
hsa-miR-3127-5p	NUB1	protein-coding	NM_016118
hsa-miR-6741-5p	NUB1	protein-coding	NM_016118
hsa-miR-3127-5p	PACSIN3	protein-coding	NM_016223
hsa-miR-6855-5p	PACSIN3	protein-coding	NM_016223
hsa-miR-6741-5p	DUSP13	protein-coding	NM_016364
hsa-miR-6855-5p	DUSP13	protein-coding	NM_016364
hsa-miR-187-3p	BET1L	protein-coding	NM_016526
hsa-miR-6741-5p	BET1L	protein-coding	NM_016526
hsa-miR-3127-5p	NUP62	protein-coding	NM_016553
hsa-miR-6855-5p	NUP62	protein-coding	NM_016553
hsa-miR-3127-5p	DRD2	protein-coding	NM_016574
hsa-miR-362-5p	DRD2	protein-coding	NM_016574
hsa-miR-3127-5p	NME8	protein-coding	NM_016616
hsa-miR-6741-5p	NME8	protein-coding	NM_016616
hsa-miR-3127-5p	OGG1	protein-coding	NM_016819
hsa-miR-6855-5p	OGG1	protein-coding	NM_016819
hsa-miR-6741-5p	MTMR8	protein-coding	NM_017677
hsa-miR-6855-5p	MTMR8	protein-coding	NM_017677
hsa-miR-3127-5p	BEST2	protein-coding	NM_017682
hsa-miR-6741-5p	BEST2	protein-coding	NM_017682
hsa-miR-6741-5p	CLN6	protein-coding	NM_017882
hsa-miR-6855-5p	CLN6	protein-coding	NM_017882
hsa-miR-362-5p	UEVLD	protein-coding	NM_018314
hsa-miR-6855-5p	UEVLD	protein-coding	NM_018314
hsa-miR-6741-5p	TMEM74B	protein-coding	NM_018354
hsa-miR-6855-5p	TMEM74B	protein-coding	NM_018354
hsa-miR-3127-5p	FBXW5	protein-coding	NM_018998
hsa-miR-6741-5p	FBXW5	protein-coding	NM_018998
hsa-miR-3127-5p	SUSD2	protein-coding	NM_019601
hsa-miR-6855-5p	SUSD2	protein-coding	NM_019601
hsa-miR-6741-5p	CD248	protein-coding	NM_020404
hsa-miR-6855-5p	CD248	protein-coding	NM_020404
hsa-miR-362-5p	KIR2DL5A	protein-coding	NM_020535
hsa-miR-6855-5p	KIR2DL5A	protein-coding	NM_020535
hsa-miR-187-3p	CFAP92	protein-coding	NM_020741
hsa-miR-6741-5p	CFAP92	protein-coding	NM_020741
hsa-miR-3127-5p	PLEKHA4	protein-coding	NM_020904
hsa-miR-6855-5p	PLEKHA4	protein-coding	NM_020904
hsa-miR-6741-5p	MST1	protein-coding	NM_020998
hsa-miR-6855-5p	MST1	protein-coding	NM_020998
hsa-miR-187-3p	PRM3	protein-coding	NM_021247
hsa-miR-6741-5p	PRM3	protein-coding	NM_021247
hsa-miR-6741-5p	ZNF500	protein-coding	NM_021646
hsa-miR-6855-5p	ZNF500	protein-coding	NM_021646
hsa-miR-3127-5p	OTX2	protein-coding	NM_021728
hsa-miR-362-5p	OTX2	protein-coding	NM_021728
hsa-miR-6741-5p	ACBD3	protein-coding	NM_022735
hsa-miR-6855-5p	ACBD3	protein-coding	NM_022735
hsa-miR-6741-5p	JMJD4	protein-coding	NM_023007
hsa-miR-6855-5p	JMJD4	protein-coding	NM_023007
hsa-miR-3127-5p	DNAI2	protein-coding	NM_023036
hsa-miR-6741-5p	DNAI2	protein-coding	NM_023036
hsa-miR-3127-5p	KXD1	protein-coding	NM_024069
hsa-miR-6741-5p	KXD1	protein-coding	NM_024069
hsa-miR-3127-5p	KCTD15	protein-coding	NM_024076
hsa-miR-6741-5p	KCTD15	protein-coding	NM_024076
hsa-miR-362-5p	CHAC1	protein-coding	NM_024111
hsa-miR-6855-5p	CHAC1	protein-coding	NM_024111
hsa-miR-3127-5p	ARMC5	protein-coding	NM_024742
hsa-miR-6855-5p	ARMC5	protein-coding	NM_024742
hsa-miR-3127-5p	PAQR6	protein-coding	NM_024897
hsa-miR-6741-5p	PAQR6	protein-coding	NM_024897
hsa-miR-6855-5p	PAQR6	protein-coding	NM_024897
hsa-miR-6855-5p	ATAT1	protein-coding	NM_024909
hsa-miR-708-3p	ATAT1	protein-coding	NM_024909
hsa-miR-3127-5p	MYO19	protein-coding	NM_025109
hsa-miR-6855-5p	MYO19	protein-coding	NM_025109
hsa-miR-3127-5p	WNT10A	protein-coding	NM_025216
hsa-miR-6855-5p	WNT10A	protein-coding	NM_025216
hsa-miR-3127-5p	TTYH3	protein-coding	NM_025250
hsa-miR-6741-5p	TTYH3	protein-coding	NM_025250
hsa-miR-3127-5p	HID1	protein-coding	NM_030630
hsa-miR-362-5p	HID1	protein-coding	NM_030630
hsa-miR-3127-5p	HM13	protein-coding	NM_030789
hsa-miR-6741-5p	HM13	protein-coding	NM_030789
hsa-miR-6741-5p	SLIRP	protein-coding	NM_031210
hsa-miR-6855-5p	SLIRP	protein-coding	NM_031210
hsa-miR-187-3p	PITPNM3	protein-coding	NM_031220
hsa-miR-6855-5p	PITPNM3	protein-coding	NM_031220
hsa-miR-187-3p	PRSS27	protein-coding	NM_031948
hsa-miR-3127-5p	PRSS27	protein-coding	NM_031948
hsa-miR-362-5p	PRSS27	protein-coding	NM_031948
hsa-miR-362-5p	REG4	protein-coding	NM_032044
hsa-miR-6741-5p	REG4	protein-coding	NM_032044
hsa-miR-3127-5p	LOXL4	protein-coding	NM_032211
hsa-miR-362-5p	LOXL4	protein-coding	NM_032211
hsa-miR-6741-5p	FBXW9	protein-coding	NM_032301
hsa-miR-6855-5p	FBXW9	protein-coding	NM_032301
hsa-miR-6741-5p	ZNF397	protein-coding	NM_032347
hsa-miR-6855-5p	ZNF397	protein-coding	NM_032347
hsa-miR-362-5p	LAT2	protein-coding	NM_032463
hsa-miR-6741-5p	LAT2	protein-coding	NM_032463
hsa-miR-362-5p	LAT2	protein-coding	NM_032464
hsa-miR-6741-5p	LAT2	protein-coding	NM_032464
hsa-miR-3127-5p	KLHL22	protein-coding	NM_032775
hsa-miR-6855-5p	KLHL22	protein-coding	NM_032775
hsa-miR-6741-5p	ERN2	protein-coding	NM_033266
hsa-miR-6855-5p	ERN2	protein-coding	NM_033266
hsa-miR-6741-5p	TRIM3	protein-coding	NM_033278
hsa-miR-6855-5p	TRIM3	protein-coding	NM_033278
hsa-miR-3127-5p	CATSPER1	protein-coding	NM_053054
hsa-miR-6741-5p	CATSPER1	protein-coding	NM_053054
hsa-miR-187-3p	PEX16	protein-coding	NM_057174
hsa-miR-6855-5p	PEX16	protein-coding	NM_057174
hsa-miR-187-3p	ACY3	protein-coding	NM_080658
hsa-miR-3127-5p	ACY3	protein-coding	NM_080658
hsa-miR-3127-5p	H2AB3	protein-coding	NM_080720
hsa-miR-6855-5p	H2AB3	protein-coding	NM_080720
hsa-miR-6741-5p	WFDC10A	protein-coding	NM_080753
hsa-miR-6855-5p	WFDC10A	protein-coding	NM_080753
hsa-miR-3127-5p	JDP2	protein-coding	NM_130469
hsa-miR-6741-5p	JDP2	protein-coding	NM_130469
hsa-miR-6741-5p	PLCD3	protein-coding	NM_133373
hsa-miR-6855-5p	PLCD3	protein-coding	NM_133373
hsa-miR-362-5p	SYN2	protein-coding	NM_133625
hsa-miR-6741-5p	SYN2	protein-coding	NM_133625
hsa-miR-3127-5p	MYADM	protein-coding	NM_138373
hsa-miR-6741-5p	MYADM	protein-coding	NM_138373
hsa-miR-362-5p	CMTM7	protein-coding	NM_138410
hsa-miR-6855-5p	CMTM7	protein-coding	NM_138410
hsa-miR-3127-5p	IL31RA	protein-coding	NM_139017
hsa-miR-6741-5p	IL31RA	protein-coding	NM_139017
hsa-miR-3127-5p	DHRS13	protein-coding	NM_144683
hsa-miR-6741-5p	DHRS13	protein-coding	NM_144683
hsa-miR-187-3p	UBALD1	protein-coding	NM_145253
hsa-miR-6741-5p	UBALD1	protein-coding	NM_145253
hsa-miR-6741-5p	ANKRD9	protein-coding	NM_152326
hsa-miR-6855-5p	ANKRD9	protein-coding	NM_152326
hsa-miR-3127-5p	ANKRD13B	protein-coding	NM_152345
hsa-miR-6855-5p	ANKRD13B	protein-coding	NM_152345
hsa-miR-3127-5p	GLIPR1L2	protein-coding	NM_152436
hsa-miR-6741-5p	GLIPR1L2	protein-coding	NM_152436
hsa-miR-3127-5p	SNX32	protein-coding	NM_152760
hsa-miR-6855-5p	SNX32	protein-coding	NM_152760
hsa-miR-362-5p	FAS	protein-coding	NM_152871
hsa-miR-6855-5p	FAS	protein-coding	NM_152871
hsa-miR-362-5p	FAS	protein-coding	NM_152872
hsa-miR-6855-5p	FAS	protein-coding	NM_152872
hsa-miR-3127-5p	PTK7	protein-coding	NM_152880
hsa-miR-6855-5p	PTK7	protein-coding	NM_152880
hsa-miR-3127-5p	PTK7	protein-coding	NM_152881
hsa-miR-6855-5p	PTK7	protein-coding	NM_152881
hsa-miR-3127-5p	PTK7	protein-coding	NM_152882
hsa-miR-6855-5p	PTK7	protein-coding	NM_152882
hsa-miR-6741-5p	FBLN7	protein-coding	NM_153214
hsa-miR-6855-5p	FBLN7	protein-coding	NM_153214
hsa-miR-6741-5p	SLC16A11	protein-coding	NM_153357
hsa-miR-6855-5p	SLC16A11	protein-coding	NM_153357
hsa-miR-362-5p	KIR3DL3	protein-coding	NM_153443
hsa-miR-6855-5p	KIR3DL3	protein-coding	NM_153443
hsa-miR-3127-5p	NUP62	protein-coding	NM_153718
hsa-miR-6855-5p	NUP62	protein-coding	NM_153718
hsa-miR-3127-5p	NUP62	protein-coding	NM_153719
hsa-miR-6855-5p	NUP62	protein-coding	NM_153719
hsa-miR-3127-5p	RASSF1	protein-coding	NM_170712
hsa-miR-6741-5p	RASSF1	protein-coding	NM_170712
hsa-miR-3127-5p	RASSF1	protein-coding	NM_170713
hsa-miR-6741-5p	RASSF1	protein-coding	NM_170713
hsa-miR-3127-5p	RASSF1	protein-coding	NM_170714
hsa-miR-6741-5p	RASSF1	protein-coding	NM_170714
hsa-miR-3127-5p	KCNH2	protein-coding	NM_172056
hsa-miR-6855-5p	KCNH2	protein-coding	NM_172056
hsa-miR-3127-5p	KCNQ2	protein-coding	NM_172106
hsa-miR-6855-5p	KCNQ2	protein-coding	NM_172106
hsa-miR-3127-5p	KCNQ2	protein-coding	NM_172107
hsa-miR-6855-5p	KCNQ2	protein-coding	NM_172107
hsa-miR-3127-5p	KCNQ2	protein-coding	NM_172108
hsa-miR-6855-5p	KCNQ2	protein-coding	NM_172108
hsa-miR-3127-5p	OTX2	protein-coding	NM_172337
hsa-miR-362-5p	OTX2	protein-coding	NM_172337
hsa-miR-362-5p	KRT78	protein-coding	NM_173352
hsa-miR-6855-5p	KRT78	protein-coding	NM_173352
hsa-miR-3127-5p	SIGLECL1	protein-coding	NM_173635
hsa-miR-6741-5p	SIGLECL1	protein-coding	NM_173635
hsa-miR-6741-5p	SLC25A41	protein-coding	NM_173637
hsa-miR-6855-5p	SLC25A41	protein-coding	NM_173637
hsa-miR-3127-5p	CES4A	protein-coding	NM_173815
hsa-miR-6741-5p	CES4A	protein-coding	NM_173815
hsa-miR-3127-5p	SSX2	protein-coding	NM_175698
hsa-miR-6855-5p	SSX2	protein-coding	NM_175698
hsa-miR-3127-5p	RHOC	protein-coding	NM_175744
hsa-miR-6741-5p	RHOC	protein-coding	NM_175744
hsa-miR-3127-5p	GNRH2	protein-coding	NM_178331
hsa-miR-6741-5p	GNRH2	protein-coding	NM_178331
hsa-miR-3127-5p	GNRH2	protein-coding	NM_178332
hsa-miR-6741-5p	GNRH2	protein-coding	NM_178332
hsa-miR-6741-5p	C20orf85	protein-coding	NM_178456
hsa-miR-6855-5p	C20orf85	protein-coding	NM_178456
hsa-miR-3127-5p	HM13	protein-coding	NM_178581
hsa-miR-6741-5p	HM13	protein-coding	NM_178581
hsa-miR-3127-5p	PLD6	protein-coding	NM_178836
hsa-miR-6855-5p	PLD6	protein-coding	NM_178836
hsa-miR-362-5p	CMTM7	protein-coding	NM_181472
hsa-miR-6855-5p	CMTM7	protein-coding	NM_181472
hsa-miR-3127-5p	PPP2R2C	protein-coding	NM_181876
hsa-miR-6855-5p	PPP2R2C	protein-coding	NM_181876
hsa-miR-3127-5p	CBLN2	protein-coding	NM_182511
hsa-miR-6855-5p	CBLN2	protein-coding	NM_182511
hsa-miR-3127-5p	SPNS3	protein-coding	NM_182538
hsa-miR-362-5p	SPNS3	protein-coding	NM_182538
hsa-miR-187-3p	TAFA3	protein-coding	NM_182759
hsa-miR-6741-5p	TAFA3	protein-coding	NM_182759
hsa-miR-3127-5p	NPM2	protein-coding	NM_182795
hsa-miR-6741-5p	NPM2	protein-coding	NM_182795
hsa-miR-3127-5p	MICALL2	protein-coding	NM_182924
hsa-miR-6741-5p	MICALL2	protein-coding	NM_182924
hsa-miR-187-3p	NEDD9	protein-coding	NM_182966
hsa-miR-6855-5p	NEDD9	protein-coding	NM_182966
hsa-miR-3127-5p	OSGIN1	protein-coding	NM_182981
hsa-miR-6741-5p	OSGIN1	protein-coding	NM_182981
hsa-miR-3127-5p	SLC22A18	protein-coding	NM_183233
hsa-miR-6855-5p	SLC22A18	protein-coding	NM_183233
hsa-miR-3127-5p	WDR86	protein-coding	NM_198285
hsa-miR-6741-5p	WDR86	protein-coding	NM_198285
hsa-miR-3127-5p	ERGIC3	protein-coding	NM_198398
hsa-miR-6855-5p	ERGIC3	protein-coding	NM_198398
hsa-miR-6741-5p	TBC1D10C	protein-coding	NM_198517
hsa-miR-6855-5p	TBC1D10C	protein-coding	NM_198517
hsa-miR-187-3p	SIAH3	protein-coding	NM_198849
hsa-miR-6855-5p	SIAH3	protein-coding	NM_198849
hsa-miR-362-5p	HINFP	protein-coding	NM_198971
hsa-miR-6855-5p	HINFP	protein-coding	NM_198971
hsa-miR-3127-5p	BGLAP	protein-coding	NM_199173
hsa-miR-6741-5p	BGLAP	protein-coding	NM_199173
hsa-miR-6855-5p	BGLAP	protein-coding	NM_199173
hsa-miR-3127-5p	METAP1D	protein-coding	NM_199227
hsa-miR-6855-5p	METAP1D	protein-coding	NM_199227
hsa-miR-6741-5p	TEAD4	protein-coding	NM_201441
hsa-miR-6855-5p	TEAD4	protein-coding	NM_201441
hsa-miR-6741-5p	TEAD4	protein-coding	NM_201443
hsa-miR-6855-5p	TEAD4	protein-coding	NM_201443
hsa-miR-3127-5p	OSCP1	protein-coding	NM_206837
hsa-miR-6741-5p	OSCP1	protein-coding	NM_206837
hsa-miR-3127-5p	DEGS2	protein-coding	NM_206918
hsa-miR-6741-5p	DEGS2	protein-coding	NM_206918
hsa-miR-6741-5p	TUBA3E	protein-coding	NM_207312
hsa-miR-6855-5p	TUBA3E	protein-coding	NM_207312
hsa-miR-3127-5p	ARID5A	protein-coding	NM_212481
hsa-miR-6741-5p	ARID5A	protein-coding	NM_212481
hsa-miR-6855-5p	ARID5A	protein-coding	NM_212481
hsa-miR-187-3p	PLA2G4F	protein-coding	NM_213600
hsa-miR-3127-5p	PLA2G4F	protein-coding	NM_213600
hsa-miR-3127-5p	SFXN4	protein-coding	NM_213649
hsa-miR-6855-5p	SFXN4	protein-coding	NM_213649
hsa-miR-3127-5p	SNORD115-1	non-coding	NR_001291
hsa-miR-362-5p	SNORD115-1	non-coding	NR_001291
hsa-miR-362-5p	TTTY7	non-coding	NR_001534
hsa-miR-6741-5p	TTTY7	non-coding	NR_001534
hsa-miR-3127-5p	TTTY1	non-coding	NR_001538
hsa-miR-6741-5p	TTTY1	non-coding	NR_001538
hsa-miR-6741-5p	ASAP1-IT1	non-coding	NR_002765
hsa-miR-6855-5p	ASAP1-IT1	non-coding	NR_002765
hsa-miR-3127-5p	SNORD115-14	non-coding	NR_003306
hsa-miR-362-5p	SNORD115-14	non-coding	NR_003306
hsa-miR-3127-5p	SNORD115-23	non-coding	NR_003315
hsa-miR-362-5p	SNORD115-23	non-coding	NR_003315
hsa-miR-3127-5p	SNORD115-26	non-coding	NR_003343
hsa-miR-362-5p	SNORD115-26	non-coding	NR_003343
hsa-miR-3127-5p	SNORD115-30	non-coding	NR_003345
hsa-miR-362-5p	SNORD115-30	non-coding	NR_003345
hsa-miR-3127-5p	SNORD115-32	non-coding	NR_003347
hsa-miR-6741-5p	SNORD115-32	non-coding	NR_003347
hsa-miR-362-5p	GTF2IP4	non-coding	NR_003580
hsa-miR-6741-5p	GTF2IP4	non-coding	NR_003580
hsa-miR-3127-5p	TTTY1B	non-coding	NR_003589
hsa-miR-6741-5p	TTTY1B	non-coding	NR_003589
hsa-miR-362-5p	TTTY7B	non-coding	NR_003592
hsa-miR-6741-5p	TTTY7B	non-coding	NR_003592
hsa-miR-6741-5p	MCTS2P	non-coding	NR_003677
hsa-miR-708-3p	MCTS2P	non-coding	NR_003677
hsa-miR-3127-5p	CHIAP2	non-coding	NR_003928
hsa-miR-6741-5p	CHIAP2	non-coding	NR_003928
hsa-miR-3127-5p	POFUT2	non-coding	NR_004858
hsa-miR-6855-5p	POFUT2	non-coding	NR_004858
hsa-miR-3127-5p	LINC00930	non-coding	NR_021493
hsa-miR-6741-5p	LINC00930	non-coding	NR_021493
hsa-miR-3127-5p	SMCR5	non-coding	NR_024007
hsa-miR-6741-5p	SMCR5	non-coding	NR_024007
hsa-miR-6855-5p	SMCR5	non-coding	NR_024007
hsa-miR-3127-5p	SNAR-A4	non-coding	NR_024215
hsa-miR-6855-5p	SNAR-A4	non-coding	NR_024215
hsa-miR-3127-5p	SNAR-A6	non-coding	NR_024227
hsa-miR-6855-5p	SNAR-A6	non-coding	NR_024227
hsa-miR-3127-5p	SNAR-A8	non-coding	NR_024228
hsa-miR-6855-5p	SNAR-A8	non-coding	NR_024228
hsa-miR-3127-5p	GATA3-AS1	non-coding	NR_024256
hsa-miR-6855-5p	GATA3-AS1	non-coding	NR_024256
hsa-miR-3127-5p	SLC24A3-AS1	non-coding	NR_024564
hsa-miR-6741-5p	SLC24A3-AS1	non-coding	NR_024564
hsa-miR-3127-5p	APOO	non-coding	NR_026545
hsa-miR-6855-5p	APOO	non-coding	NR_026545
hsa-miR-6741-5p	LINC01554	non-coding	NR_026936
hsa-miR-6855-5p	LINC01554	non-coding	NR_026936
hsa-miR-3127-5p	LINC00293	non-coding	NR_027013
hsa-miR-6741-5p	LINC00293	non-coding	NR_027013
hsa-miR-6741-5p	MIRLET7BHG	non-coding	NR_027033
hsa-miR-6855-5p	MIRLET7BHG	non-coding	NR_027033
hsa-miR-3127-5p	ATP6V0E2-AS1	non-coding	NR_027040
hsa-miR-362-5p	ATP6V0E2-AS1	non-coding	NR_027040
hsa-miR-187-3p	TTC41P	non-coding	NR_027249
hsa-miR-6855-5p	TTC41P	non-coding	NR_027249
hsa-miR-3127-5p	XPA	non-coding	NR_027302
hsa-miR-6741-5p	XPA	non-coding	NR_027302
hsa-miR-6741-5p	TATDN1	non-coding	NR_027427
hsa-miR-6855-5p	TATDN1	non-coding	NR_027427
hsa-miR-6741-5p	PANX2	non-coding	NR_027691
hsa-miR-6855-5p	PANX2	non-coding	NR_027691
hsa-miR-6741-5p	PMS2P9	non-coding	NR_028058
hsa-miR-6855-5p	PMS2P9	non-coding	NR_028058
hsa-miR-6741-5p	LINC00942	non-coding	NR_028415
hsa-miR-6855-5p	LINC00942	non-coding	NR_028415
hsa-miR-3127-5p	MIR24-2	non-coding	NR_029497
hsa-miR-6855-5p	MIR24-2	non-coding	NR_029497
hsa-miR-3127-5p	MIR141	non-coding	NR_029682
hsa-miR-6855-5p	MIR141	non-coding	NR_029682
hsa-miR-3127-5p	MIR200C	non-coding	NR_029779
hsa-miR-6855-5p	MIR200C	non-coding	NR_029779
hsa-miR-187-3p	MIR329-1	non-coding	NR_029967
hsa-miR-6855-5p	MIR329-1	non-coding	NR_029967
hsa-miR-187-3p	MIR329-2	non-coding	NR_029968
hsa-miR-3127-5p	MIR329-2	non-coding	NR_029968
hsa-miR-3127-5p	MIR500A	non-coding	NR_030224
hsa-miR-362-5p	MIR500A	non-coding	NR_030224
hsa-miR-362-5p	MIR631	non-coding	NR_030360
hsa-miR-6855-5p	MIR631	non-coding	NR_030360
hsa-miR-3127-5p	MIR650	non-coding	NR_030755
hsa-miR-6741-5p	MIR650	non-coding	NR_030755
hsa-miR-187-3p	NDC1	non-coding	NR_033142
hsa-miR-6855-5p	NDC1	non-coding	NR_033142
hsa-miR-6741-5p	TCF7	non-coding	NR_033449
hsa-miR-6855-5p	TCF7	non-coding	NR_033449
hsa-miR-6741-5p	CENPVL1	non-coding	NR_033772
hsa-miR-6855-5p	CENPVL1	non-coding	NR_033772
hsa-miR-6741-5p	CENPVL2	non-coding	NR_033773
hsa-miR-6855-5p	CENPVL2	non-coding	NR_033773
hsa-miR-3127-5p	LOC100289361	non-coding	NR_034032
hsa-miR-6741-5p	LOC100289361	non-coding	NR_034032
hsa-miR-3127-5p	MIR3183	non-coding	NR_036148
hsa-miR-6855-5p	MIR3183	non-coding	NR_036148
hsa-miR-187-3p	MIR3199-1	non-coding	NR_036169
hsa-miR-362-5p	MIR3199-1	non-coding	NR_036169
hsa-miR-3127-5p	MIR4320	non-coding	NR_036204
hsa-miR-6855-5p	MIR4320	non-coding	NR_036204
hsa-miR-362-5p	MIR4324	non-coding	NR_036209
hsa-miR-6741-5p	MIR4324	non-coding	NR_036209
hsa-miR-3127-5p	FOXN3-AS1	non-coding	NR_036500
hsa-miR-6741-5p	FOXN3-AS1	non-coding	NR_036500
hsa-miR-3127-5p	MIR23AHG	non-coding	NR_036515
hsa-miR-6855-5p	MIR23AHG	non-coding	NR_036515
hsa-miR-3127-5p	TNFSF12	non-coding	NR_037146
hsa-miR-6855-5p	TNFSF12	non-coding	NR_037146
hsa-miR-3127-5p	MIR3615	non-coding	NR_037409
hsa-miR-6855-5p	MIR3615	non-coding	NR_037409
hsa-miR-3127-5p	MIR3663	non-coding	NR_037436
hsa-miR-6741-5p	MIR3663	non-coding	NR_037436
hsa-miR-187-3p	EEF1E1-BLOC1S5	non-coding	NR_037618
hsa-miR-3127-5p	EEF1E1-BLOC1S5	non-coding	NR_037618
hsa-miR-6741-5p	ATP6V1G2-DDX39B	non-coding	NR_037853
hsa-miR-6855-5p	ATP6V1G2-DDX39B	non-coding	NR_037853
hsa-miR-3127-5p	MYLK-AS1	non-coding	NR_038266
hsa-miR-6855-5p	MYLK-AS1	non-coding	NR_038266
hsa-miR-362-5p	OR51B5	non-coding	NR_038321
hsa-miR-6741-5p	OR51B5	non-coding	NR_038321
hsa-miR-3127-5p	LINC01667	non-coding	NR_038377
hsa-miR-6855-5p	LINC01667	non-coding	NR_038377
hsa-miR-362-5p	LINC01132	non-coding	NR_038856
hsa-miR-6741-5p	LINC01132	non-coding	NR_038856
hsa-miR-3127-5p	LINC00838	non-coding	NR_038932
hsa-miR-6855-5p	LINC00838	non-coding	NR_038932
hsa-miR-3127-5p	MIR4442	non-coding	NR_039644
hsa-miR-6741-5p	MIR4442	non-coding	NR_039644
hsa-miR-3127-5p	MIR4454	non-coding	NR_039659
hsa-miR-6741-5p	MIR4454	non-coding	NR_039659
hsa-miR-187-3p	MIR4492	non-coding	NR_039713
hsa-miR-6855-5p	MIR4492	non-coding	NR_039713
hsa-miR-3127-5p	MIR4515	non-coding	NR_039740
hsa-miR-6741-5p	MIR4515	non-coding	NR_039740
hsa-miR-6741-5p	MIR4516	non-coding	NR_039741
hsa-miR-6855-5p	MIR4516	non-coding	NR_039741
hsa-miR-3127-5p	MIR4747	non-coding	NR_039902
hsa-miR-6855-5p	MIR4747	non-coding	NR_039902
hsa-miR-187-3p	MIR4754	non-coding	NR_039910
hsa-miR-3127-5p	MIR4754	non-coding	NR_039910
hsa-miR-187-3p	ISM1-AS1	non-coding	NR_040043
hsa-miR-3127-5p	ISM1-AS1	non-coding	NR_040043
hsa-miR-187-3p	DCST1-AS1	non-coding	NR_040773
hsa-miR-6855-5p	DCST1-AS1	non-coding	NR_040773
hsa-miR-3127-5p	GS1-24F4.2	non-coding	NR_045217
hsa-miR-708-3p	GS1-24F4.2	non-coding	NR_045217
hsa-miR-3127-5p	GPR78	non-coding	NR_045511
hsa-miR-6741-5p	GPR78	non-coding	NR_045511
hsa-miR-6741-5p	GMDS-DT	non-coding	NR_046229
hsa-miR-6855-5p	GMDS-DT	non-coding	NR_046229
hsa-miR-6741-5p	TBC1D10C	non-coding	NR_046266
hsa-miR-6855-5p	TBC1D10C	non-coding	NR_046266
hsa-miR-3127-5p	POLD1	non-coding	NR_046402
hsa-miR-6855-5p	POLD1	non-coding	NR_046402
hsa-miR-6741-5p	RNU6-28P	non-coding	NR_046489
hsa-miR-6855-5p	RNU6-28P	non-coding	NR_046489
hsa-miR-3127-5p	KCNAB1-AS2	non-coding	NR_046617
hsa-miR-6855-5p	KCNAB1-AS2	non-coding	NR_046617
hsa-miR-6855-5p	LINC00395	non-coding	NR_047011
hsa-miR-708-3p	LINC00395	non-coding	NR_047011
hsa-miR-3127-5p	UBE2V1	non-coding	NR_047554
hsa-miR-6741-5p	UBE2V1	non-coding	NR_047554
hsa-miR-6741-5p	POLR3E	non-coding	NR_047581
hsa-miR-6855-5p	POLR3E	non-coding	NR_047581
hsa-miR-3127-5p	MIR5708	non-coding	NR_049894
hsa-miR-6741-5p	MIR5708	non-coding	NR_049894
hsa-miR-6741-5p	SLIRP	non-coding	NR_052025
hsa-miR-6855-5p	SLIRP	non-coding	NR_052025
hsa-miR-3127-5p	PHLDA3	non-coding	NR_073080
hsa-miR-6741-5p	PHLDA3	non-coding	NR_073080
hsa-miR-3127-5p	PSD	non-coding	NR_073110
hsa-miR-6855-5p	PSD	non-coding	NR_073110
hsa-miR-187-3p	HPS4	non-coding	NR_073136
hsa-miR-6855-5p	HPS4	non-coding	NR_073136
hsa-miR-6741-5p	DEFB119	non-coding	NR_073151
hsa-miR-6855-5p	DEFB119	non-coding	NR_073151
hsa-miR-6741-5p	DEFB119	non-coding	NR_073152
hsa-miR-6855-5p	DEFB119	non-coding	NR_073152
hsa-miR-6741-5p	DEFB119	non-coding	NR_073153
hsa-miR-6855-5p	DEFB119	non-coding	NR_073153
hsa-miR-6741-5p	TMEM220-AS1	non-coding	NR_073457
hsa-miR-6855-5p	TMEM220-AS1	non-coding	NR_073457
hsa-miR-6741-5p	TMEM39A	non-coding	NR_073506
hsa-miR-6855-5p	TMEM39A	non-coding	NR_073506
hsa-miR-3127-5p	MAZ	non-coding	NR_074080
hsa-miR-6855-5p	MAZ	non-coding	NR_074080
hsa-miR-6741-5p	LYST	non-coding	NR_102436
hsa-miR-6855-5p	LYST	non-coding	NR_102436
hsa-miR-187-3p	LINC01301	non-coding	NR_103854
hsa-miR-6855-5p	LINC01301	non-coding	NR_103854
hsa-miR-3127-5p	ZNHIT3	non-coding	NR_104009
hsa-miR-6855-5p	ZNHIT3	non-coding	NR_104009
hsa-miR-3127-5p	ZNHIT3	non-coding	NR_104010
hsa-miR-6855-5p	ZNHIT3	non-coding	NR_104010
hsa-miR-362-5p	MLPH	non-coding	NR_104019
hsa-miR-6741-5p	MLPH	non-coding	NR_104019
hsa-miR-3127-5p	VPS29	non-coding	NR_104099
hsa-miR-6741-5p	VPS29	non-coding	NR_104099
hsa-miR-3127-5p	VPS29	non-coding	NR_104100
hsa-miR-6741-5p	VPS29	non-coding	NR_104100
hsa-miR-3127-5p	VPS29	non-coding	NR_104101
hsa-miR-6741-5p	VPS29	non-coding	NR_104101
hsa-miR-3127-5p	VPS29	non-coding	NR_104102
hsa-miR-6741-5p	VPS29	non-coding	NR_104102
hsa-miR-3127-5p	SIGMAR1	non-coding	NR_104108
hsa-miR-6855-5p	SIGMAR1	non-coding	NR_104108
hsa-miR-3127-5p	UBE2V1	non-coding	NR_104218
hsa-miR-6741-5p	UBE2V1	non-coding	NR_104218
hsa-miR-3127-5p	GATA3-AS1	non-coding	NR_104327
hsa-miR-6855-5p	GATA3-AS1	non-coding	NR_104327
hsa-miR-3127-5p	GATA3-AS1	non-coding	NR_104336
hsa-miR-6855-5p	GATA3-AS1	non-coding	NR_104336
hsa-miR-6741-5p	TEX30	non-coding	NR_104590
hsa-miR-6855-5p	TEX30	non-coding	NR_104590
hsa-miR-362-5p	MIR6749	non-coding	NR_106807
hsa-miR-6855-5p	MIR6749	non-coding	NR_106807
hsa-miR-3127-5p	MIR6756	non-coding	NR_106814
hsa-miR-6741-5p	MIR6756	non-coding	NR_106814
hsa-miR-3127-5p	MIR6763	non-coding	NR_106821
hsa-miR-6741-5p	MIR6763	non-coding	NR_106821
hsa-miR-3127-5p	MIR6846	non-coding	NR_106905
hsa-miR-6741-5p	MIR6846	non-coding	NR_106905
hsa-miR-187-3p	MIR6871	non-coding	NR_106931
hsa-miR-6855-5p	MIR6871	non-coding	NR_106931
hsa-miR-3127-5p	MIR6895	non-coding	NR_106955
hsa-miR-6855-5p	MIR6895	non-coding	NR_106955
hsa-miR-3127-5p	CLSTN2-AS1	non-coding	NR_108084
hsa-miR-362-5p	CLSTN2-AS1	non-coding	NR_108084

## Sheet: Group3
miRNA	Target	Type	Annotation			hsa-miR-187-3p
hsa-miR-320e	APOA1	protein-coding	NM_000039			hsa-miR-218-5p
hsa-miR-6855-5p	APOA1	protein-coding	NM_000039			hsa-miR-302a-3p
hsa-miR-320e	LAMB3	protein-coding	NM_000228			hsa-miR-320e
hsa-miR-6855-5p	LAMB3	protein-coding	NM_000228			hsa-miR-371a-5p
hsa-miR-218-5p	IL9	protein-coding	NM_000590			hsa-miR-378e
hsa-miR-302a-3p	IL9	protein-coding	NM_000590			hsa-miR-6855-5p
hsa-miR-378e	VTN	protein-coding	NM_000638
hsa-miR-6855-5p	VTN	protein-coding	NM_000638
hsa-miR-187-3p	HRH1	protein-coding	NM_000861
hsa-miR-6855-5p	HRH1	protein-coding	NM_000861
hsa-miR-187-3p	IGF1R	protein-coding	NM_000875
hsa-miR-371a-5p	IGF1R	protein-coding	NM_000875
hsa-miR-302a-3p	OXTR	protein-coding	NM_000916
hsa-miR-378e	OXTR	protein-coding	NM_000916
hsa-miR-6855-5p	OXTR	protein-coding	NM_000916
hsa-miR-218-5p	GGA1	protein-coding	NM_001001560
hsa-miR-6855-5p	GGA1	protein-coding	NM_001001560
hsa-miR-187-3p	METRNL	protein-coding	NM_001004431
hsa-miR-6855-5p	METRNL	protein-coding	NM_001004431
hsa-miR-187-3p	LRRC38	protein-coding	NM_001010847
hsa-miR-371a-5p	LRRC38	protein-coding	NM_001010847
hsa-miR-378e	NMS	protein-coding	NM_001011717
hsa-miR-6855-5p	NMS	protein-coding	NM_001011717
hsa-miR-378e	LLGL2	protein-coding	NM_001015002
hsa-miR-6855-5p	LLGL2	protein-coding	NM_001015002
hsa-miR-320e	LAMB3	protein-coding	NM_001017402
hsa-miR-6855-5p	LAMB3	protein-coding	NM_001017402
hsa-miR-378e	SSX4B	protein-coding	NM_001034832
hsa-miR-6855-5p	SSX4B	protein-coding	NM_001034832
hsa-miR-187-3p	PSAP	protein-coding	NM_001042465
hsa-miR-6855-5p	PSAP	protein-coding	NM_001042465
hsa-miR-187-3p	PSAP	protein-coding	NM_001042466
hsa-miR-6855-5p	PSAP	protein-coding	NM_001042466
hsa-miR-378e	RERE	protein-coding	NM_001042681
hsa-miR-6855-5p	RERE	protein-coding	NM_001042681
hsa-miR-378e	RERE	protein-coding	NM_001042682
hsa-miR-6855-5p	RERE	protein-coding	NM_001042682
hsa-miR-187-3p	KLK5	protein-coding	NM_001077491
hsa-miR-378e	KLK5	protein-coding	NM_001077491
hsa-miR-187-3p	KLK5	protein-coding	NM_001077492
hsa-miR-378e	KLK5	protein-coding	NM_001077492
hsa-miR-187-3p	GPR108	protein-coding	NM_001080452
hsa-miR-320e	GPR108	protein-coding	NM_001080452
hsa-miR-302a-3p	LIPK	protein-coding	NM_001080518
hsa-miR-320e	LIPK	protein-coding	NM_001080518
hsa-miR-187-3p	KIR2DL4	protein-coding	NM_001080772
hsa-miR-320e	KIR2DL4	protein-coding	NM_001080772
hsa-miR-187-3p	HRH1	protein-coding	NM_001098211
hsa-miR-6855-5p	HRH1	protein-coding	NM_001098211
hsa-miR-187-3p	HRH1	protein-coding	NM_001098212
hsa-miR-6855-5p	HRH1	protein-coding	NM_001098212
hsa-miR-187-3p	HRH1	protein-coding	NM_001098213
hsa-miR-6855-5p	HRH1	protein-coding	NM_001098213
hsa-miR-218-5p	ULK3	protein-coding	NM_001099436
hsa-miR-6855-5p	ULK3	protein-coding	NM_001099436
hsa-miR-378e	LDB1	protein-coding	NM_001113407
hsa-miR-6855-5p	LDB1	protein-coding	NM_001113407
hsa-miR-302a-3p	MAD2L2	protein-coding	NM_001127325
hsa-miR-6855-5p	MAD2L2	protein-coding	NM_001127325
hsa-miR-320e	LAMB3	protein-coding	NM_001127641
hsa-miR-6855-5p	LAMB3	protein-coding	NM_001127641
hsa-miR-302a-3p	SPARCL1	protein-coding	NM_001128310
hsa-miR-320e	SPARCL1	protein-coding	NM_001128310
hsa-miR-302a-3p	NFATC4	protein-coding	NM_001136022
hsa-miR-6855-5p	NFATC4	protein-coding	NM_001136022
hsa-miR-302a-3p	LANCL1	protein-coding	NM_001136574
hsa-miR-378e	LANCL1	protein-coding	NM_001136574
hsa-miR-302a-3p	LANCL1	protein-coding	NM_001136575
hsa-miR-378e	LANCL1	protein-coding	NM_001136575
hsa-miR-378e	RAP1GAP	protein-coding	NM_001145657
hsa-miR-6855-5p	RAP1GAP	protein-coding	NM_001145657
hsa-miR-378e	RAP1GAP	protein-coding	NM_001145658
hsa-miR-6855-5p	RAP1GAP	protein-coding	NM_001145658
hsa-miR-371a-5p	SAE1	protein-coding	NM_001145713
hsa-miR-6855-5p	SAE1	protein-coding	NM_001145713
hsa-miR-371a-5p	PARP9	protein-coding	NM_001146102
hsa-miR-6855-5p	PARP9	protein-coding	NM_001146102
hsa-miR-371a-5p	PARP9	protein-coding	NM_001146103
hsa-miR-6855-5p	PARP9	protein-coding	NM_001146103
hsa-miR-371a-5p	PARP9	protein-coding	NM_001146104
hsa-miR-6855-5p	PARP9	protein-coding	NM_001146104
hsa-miR-371a-5p	PARP9	protein-coding	NM_001146105
hsa-miR-6855-5p	PARP9	protein-coding	NM_001146105
hsa-miR-302a-3p	KDM4E	protein-coding	NM_001161630
hsa-miR-6855-5p	KDM4E	protein-coding	NM_001161630
hsa-miR-302a-3p	MUC12	protein-coding	NM_001164462
hsa-miR-6855-5p	MUC12	protein-coding	NM_001164462
hsa-miR-371a-5p	FXYD5	protein-coding	NM_001164605
hsa-miR-6855-5p	FXYD5	protein-coding	NM_001164605
hsa-miR-187-3p	PITPNM3	protein-coding	NM_001165966
hsa-miR-6855-5p	PITPNM3	protein-coding	NM_001165966
hsa-miR-378e	ENDOU	protein-coding	NM_001172439
hsa-miR-6855-5p	ENDOU	protein-coding	NM_001172439
hsa-miR-378e	ENDOU	protein-coding	NM_001172440
hsa-miR-6855-5p	ENDOU	protein-coding	NM_001172440
hsa-miR-218-5p	GGA1	protein-coding	NM_001172687
hsa-miR-6855-5p	GGA1	protein-coding	NM_001172687
hsa-miR-218-5p	GGA1	protein-coding	NM_001172688
hsa-miR-6855-5p	GGA1	protein-coding	NM_001172688
hsa-miR-378e	MSLN	protein-coding	NM_001177355
hsa-miR-6855-5p	MSLN	protein-coding	NM_001177355
hsa-miR-302a-3p	ZNF454	protein-coding	NM_001178089
hsa-miR-6855-5p	ZNF454	protein-coding	NM_001178089
hsa-miR-302a-3p	ZNF454	protein-coding	NM_001178090
hsa-miR-6855-5p	ZNF454	protein-coding	NM_001178090
hsa-miR-218-5p	NUP62	protein-coding	NM_001193357
hsa-miR-6855-5p	NUP62	protein-coding	NM_001193357
hsa-miR-187-3p	IRF3	protein-coding	NM_001197122
hsa-miR-302a-3p	IRF3	protein-coding	NM_001197122
hsa-miR-320e	NFATC4	protein-coding	NM_001198965
hsa-miR-6855-5p	NFATC4	protein-coding	NM_001198965
hsa-miR-320e	NFATC4	protein-coding	NM_001198966
hsa-miR-6855-5p	NFATC4	protein-coding	NM_001198966
hsa-miR-320e	NFATC4	protein-coding	NM_001198967
hsa-miR-6855-5p	NFATC4	protein-coding	NM_001198967
hsa-miR-371a-5p	ANKS1B	protein-coding	NM_001204081
hsa-miR-378e	ANKS1B	protein-coding	NM_001204081
hsa-miR-371a-5p	TSC22D1	protein-coding	NM_001243797
hsa-miR-6855-5p	TSC22D1	protein-coding	NM_001243797
hsa-miR-371a-5p	TSC22D1	protein-coding	NM_001243798
hsa-miR-6855-5p	TSC22D1	protein-coding	NM_001243798
hsa-miR-378e	TRIM3	protein-coding	NM_001248006
hsa-miR-6855-5p	TRIM3	protein-coding	NM_001248006
hsa-miR-378e	TRIM3	protein-coding	NM_001248007
hsa-miR-6855-5p	TRIM3	protein-coding	NM_001248007
hsa-miR-187-3p	CSNK2A3	protein-coding	NM_001256686
hsa-miR-378e	CSNK2A3	protein-coding	NM_001256686
hsa-miR-320e	FBH1	protein-coding	NM_001258452
hsa-miR-6855-5p	FBH1	protein-coding	NM_001258452
hsa-miR-320e	FBH1	protein-coding	NM_001258453
hsa-miR-6855-5p	FBH1	protein-coding	NM_001258453
hsa-miR-378e	NOXO1	protein-coding	NM_001267721
hsa-miR-6855-5p	NOXO1	protein-coding	NM_001267721
hsa-miR-302a-3p	CIB2	protein-coding	NM_001271888
hsa-miR-6855-5p	CIB2	protein-coding	NM_001271888
hsa-miR-302a-3p	CIB2	protein-coding	NM_001271889
hsa-miR-6855-5p	CIB2	protein-coding	NM_001271889
hsa-miR-302a-3p	P2RY6	protein-coding	NM_001277204
hsa-miR-6855-5p	P2RY6	protein-coding	NM_001277204
hsa-miR-302a-3p	P2RY6	protein-coding	NM_001277205
hsa-miR-6855-5p	P2RY6	protein-coding	NM_001277205
hsa-miR-302a-3p	P2RY6	protein-coding	NM_001277206
hsa-miR-6855-5p	P2RY6	protein-coding	NM_001277206
hsa-miR-302a-3p	P2RY6	protein-coding	NM_001277207
hsa-miR-6855-5p	P2RY6	protein-coding	NM_001277207
hsa-miR-302a-3p	P2RY6	protein-coding	NM_001277208
hsa-miR-6855-5p	P2RY6	protein-coding	NM_001277208
hsa-miR-378e	IGSF9B	protein-coding	NM_001277285
hsa-miR-6855-5p	IGSF9B	protein-coding	NM_001277285
hsa-miR-302a-3p	CCT8	protein-coding	NM_001282907
hsa-miR-378e	CCT8	protein-coding	NM_001282907
hsa-miR-302a-3p	CCT8	protein-coding	NM_001282908
hsa-miR-378e	CCT8	protein-coding	NM_001282908
hsa-miR-302a-3p	CCT8	protein-coding	NM_001282909
hsa-miR-378e	CCT8	protein-coding	NM_001282909
hsa-miR-218-5p	ULK3	protein-coding	NM_001284364
hsa-miR-6855-5p	ULK3	protein-coding	NM_001284364
hsa-miR-218-5p	ULK3	protein-coding	NM_001284365
hsa-miR-6855-5p	ULK3	protein-coding	NM_001284365
hsa-miR-320e	NEURL3	protein-coding	NM_001285485
hsa-miR-378e	NEURL3	protein-coding	NM_001285485
hsa-miR-320e	NEURL3	protein-coding	NM_001285486
hsa-miR-378e	NEURL3	protein-coding	NM_001285486
hsa-miR-187-3p	APEH	protein-coding	NM_001640
hsa-miR-6855-5p	APEH	protein-coding	NM_001640
hsa-miR-218-5p	CKM	protein-coding	NM_001824
hsa-miR-371a-5p	CKM	protein-coding	NM_001824
hsa-miR-378e	MSH3	protein-coding	NM_002439
hsa-miR-6855-5p	MSH3	protein-coding	NM_002439
hsa-miR-187-3p	MSI1	protein-coding	NM_002442
hsa-miR-371a-5p	MSI1	protein-coding	NM_002442
hsa-miR-378e	PLP2	protein-coding	NM_002668
hsa-miR-6855-5p	PLP2	protein-coding	NM_002668
hsa-miR-187-3p	PSAP	protein-coding	NM_002778
hsa-miR-6855-5p	PSAP	protein-coding	NM_002778
hsa-miR-371a-5p	RAD51C	protein-coding	NM_002876
hsa-miR-6855-5p	RAD51C	protein-coding	NM_002876
hsa-miR-378e	RAP1GAP	protein-coding	NM_002885
hsa-miR-6855-5p	RAP1GAP	protein-coding	NM_002885
hsa-miR-378e	LDB1	protein-coding	NM_003893
hsa-miR-6855-5p	LDB1	protein-coding	NM_003893
hsa-miR-320e	UBE2M	protein-coding	NM_003969
hsa-miR-6855-5p	UBE2M	protein-coding	NM_003969
hsa-miR-187-3p	CTSH	protein-coding	NM_004390
hsa-miR-371a-5p	CTSH	protein-coding	NM_004390
hsa-miR-320e	DUSP2	protein-coding	NM_004418
hsa-miR-6855-5p	DUSP2	protein-coding	NM_004418
hsa-miR-320e	PHC2	protein-coding	NM_004427
hsa-miR-378e	PHC2	protein-coding	NM_004427
hsa-miR-371a-5p	KIF11	protein-coding	NM_004523
hsa-miR-6855-5p	KIF11	protein-coding	NM_004523
hsa-miR-320e	NFATC4	protein-coding	NM_004554
hsa-miR-6855-5p	NFATC4	protein-coding	NM_004554
hsa-miR-302a-3p	SPARCL1	protein-coding	NM_004684
hsa-miR-320e	SPARCL1	protein-coding	NM_004684
hsa-miR-187-3p	PEX16	protein-coding	NM_004813
hsa-miR-6855-5p	PEX16	protein-coding	NM_004813
hsa-miR-320e	PPT2	protein-coding	NM_005155
hsa-miR-6855-5p	PPT2	protein-coding	NM_005155
hsa-miR-187-3p	GSC2	protein-coding	NM_005315
hsa-miR-6855-5p	GSC2	protein-coding	NM_005315
hsa-miR-187-3p	MYCL	protein-coding	NM_005376
hsa-miR-6855-5p	MYCL	protein-coding	NM_005376
hsa-miR-371a-5p	PHF2	protein-coding	NM_005392
hsa-miR-378e	PHF2	protein-coding	NM_005392
hsa-miR-371a-5p	SAE1	protein-coding	NM_005500
hsa-miR-6855-5p	SAE1	protein-coding	NM_005500
hsa-miR-378e	SSX4	protein-coding	NM_005636
hsa-miR-6855-5p	SSX4	protein-coding	NM_005636
hsa-miR-378e	MSLN	protein-coding	NM_005823
hsa-miR-6855-5p	MSLN	protein-coding	NM_005823
hsa-miR-371a-5p	TSC22D1	protein-coding	NM_006022
hsa-miR-6855-5p	TSC22D1	protein-coding	NM_006022
hsa-miR-378e	ENDOU	protein-coding	NM_006025
hsa-miR-6855-5p	ENDOU	protein-coding	NM_006025
hsa-miR-302a-3p	LANCL1	protein-coding	NM_006055
hsa-miR-378e	LANCL1	protein-coding	NM_006055
hsa-miR-378e	PRICKLE3	protein-coding	NM_006150
hsa-miR-6855-5p	PRICKLE3	protein-coding	NM_006150
hsa-miR-320e	CNKSR1	protein-coding	NM_006314
hsa-miR-6855-5p	CNKSR1	protein-coding	NM_006314
hsa-miR-302a-3p	MAD2L2	protein-coding	NM_006341
hsa-miR-6855-5p	MAD2L2	protein-coding	NM_006341
hsa-miR-302a-3p	CIB2	protein-coding	NM_006383
hsa-miR-6855-5p	CIB2	protein-coding	NM_006383
hsa-miR-378e	TRIM3	protein-coding	NM_006458
hsa-miR-6855-5p	TRIM3	protein-coding	NM_006458
hsa-miR-218-5p	PMVK	protein-coding	NM_006556
hsa-miR-6855-5p	PMVK	protein-coding	NM_006556
hsa-miR-302a-3p	CCT8	protein-coding	NM_006585
hsa-miR-378e	CCT8	protein-coding	NM_006585
hsa-miR-187-3p	LINC01565	protein-coding	NM_007354
hsa-miR-378e	LINC01565	protein-coding	NM_007354
hsa-miR-187-3p	LTB	protein-coding	NM_009588
hsa-miR-6855-5p	LTB	protein-coding	NM_009588
hsa-miR-378e	RERE	protein-coding	NM_012102
hsa-miR-6855-5p	RERE	protein-coding	NM_012102
hsa-miR-320e	FBXO2	protein-coding	NM_012168
hsa-miR-6855-5p	FBXO2	protein-coding	NM_012168
hsa-miR-187-3p	KIR2DS2	protein-coding	NM_012312
hsa-miR-6855-5p	KIR2DS2	protein-coding	NM_012312
hsa-miR-187-3p	KIR2DS3	protein-coding	NM_012313
hsa-miR-6855-5p	KIR2DS3	protein-coding	NM_012313
hsa-miR-187-3p	KIR2DS4	protein-coding	NM_012314
hsa-miR-6855-5p	KIR2DS4	protein-coding	NM_012314
hsa-miR-218-5p	NUP62	protein-coding	NM_012346
hsa-miR-6855-5p	NUP62	protein-coding	NM_012346
hsa-miR-187-3p	KLK5	protein-coding	NM_012427
hsa-miR-378e	KLK5	protein-coding	NM_012427
hsa-miR-378e	CISH	protein-coding	NM_013324
hsa-miR-6855-5p	CISH	protein-coding	NM_013324
hsa-miR-218-5p	GGA1	protein-coding	NM_013365
hsa-miR-6855-5p	GGA1	protein-coding	NM_013365
hsa-miR-378e	MSLN	protein-coding	NM_013404
hsa-miR-6855-5p	MSLN	protein-coding	NM_013404
hsa-miR-187-3p	SPCS1	protein-coding	NM_014041
hsa-miR-371a-5p	SPCS1	protein-coding	NM_014041
hsa-miR-371a-5p	FXYD5	protein-coding	NM_014164
hsa-miR-6855-5p	FXYD5	protein-coding	NM_014164
hsa-miR-187-3p	KIR2DS1	protein-coding	NM_014512
hsa-miR-6855-5p	KIR2DS1	protein-coding	NM_014512
hsa-miR-187-3p	KIR2DS5	protein-coding	NM_014513
hsa-miR-6855-5p	KIR2DS5	protein-coding	NM_014513
hsa-miR-378e	POFUT2	protein-coding	NM_015227
hsa-miR-6855-5p	POFUT2	protein-coding	NM_015227
hsa-miR-378e	YWHAH-AS1	protein-coding	NM_015372
hsa-miR-6855-5p	YWHAH-AS1	protein-coding	NM_015372
hsa-miR-320e	PTPN23	protein-coding	NM_015466
hsa-miR-378e	PTPN23	protein-coding	NM_015466
hsa-miR-371a-5p	MYO15A	protein-coding	NM_016239
hsa-miR-6855-5p	MYO15A	protein-coding	NM_016239
hsa-miR-320e	TMEM9	protein-coding	NM_016456
hsa-miR-6855-5p	TMEM9	protein-coding	NM_016456
hsa-miR-218-5p	NUP62	protein-coding	NM_016553
hsa-miR-6855-5p	NUP62	protein-coding	NM_016553
hsa-miR-371a-5p	MRPS30	protein-coding	NM_016640
hsa-miR-6855-5p	MRPS30	protein-coding	NM_016640
hsa-miR-187-3p	CENPJ	protein-coding	NM_018451
hsa-miR-378e	CENPJ	protein-coding	NM_018451
hsa-miR-320e	ELAC1	protein-coding	NM_018696
hsa-miR-378e	ELAC1	protein-coding	NM_018696
hsa-miR-371a-5p	SLAMF8	protein-coding	NM_020125
hsa-miR-6855-5p	SLAMF8	protein-coding	NM_020125
hsa-miR-371a-5p	ANKS1B	protein-coding	NM_020140
hsa-miR-378e	ANKS1B	protein-coding	NM_020140
hsa-miR-378e	PRDM9	protein-coding	NM_020227
hsa-miR-6855-5p	PRDM9	protein-coding	NM_020227
hsa-miR-187-3p	CFAP92	protein-coding	NM_020741
hsa-miR-378e	CFAP92	protein-coding	NM_020741
hsa-miR-302a-3p	WDR48	protein-coding	NM_020839
hsa-miR-6855-5p	WDR48	protein-coding	NM_020839
hsa-miR-378e	PLEKHA4	protein-coding	NM_020904
hsa-miR-6855-5p	PLEKHA4	protein-coding	NM_020904
hsa-miR-371a-5p	EEFSEC	protein-coding	NM_021937
hsa-miR-6855-5p	EEFSEC	protein-coding	NM_021937
hsa-miR-371a-5p	NUP85	protein-coding	NM_024844
hsa-miR-6855-5p	NUP85	protein-coding	NM_024844
hsa-miR-187-3p	PITPNM3	protein-coding	NM_031220
hsa-miR-6855-5p	PITPNM3	protein-coding	NM_031220
hsa-miR-371a-5p	PARP9	protein-coding	NM_031458
hsa-miR-6855-5p	PARP9	protein-coding	NM_031458
hsa-miR-320e	FBH1	protein-coding	NM_032807
hsa-miR-6855-5p	FBH1	protein-coding	NM_032807
hsa-miR-378e	CORO6	protein-coding	NM_032854
hsa-miR-6855-5p	CORO6	protein-coding	NM_032854
hsa-miR-378e	TRIM3	protein-coding	NM_033278
hsa-miR-6855-5p	TRIM3	protein-coding	NM_033278
hsa-miR-371a-5p	TUBGCP5	protein-coding	NM_052903
hsa-miR-378e	TUBGCP5	protein-coding	NM_052903
hsa-miR-187-3p	PEX16	protein-coding	NM_057174
hsa-miR-6855-5p	PEX16	protein-coding	NM_057174
hsa-miR-320e	PPT2	protein-coding	NM_138717
hsa-miR-6855-5p	PPT2	protein-coding	NM_138717
hsa-miR-378e	NOXO1	protein-coding	NM_144603
hsa-miR-6855-5p	NOXO1	protein-coding	NM_144603
hsa-miR-302a-3p	FLCN	protein-coding	NM_144606
hsa-miR-6855-5p	FLCN	protein-coding	NM_144606
hsa-miR-371a-5p	FXYD5	protein-coding	NM_144779
hsa-miR-6855-5p	FXYD5	protein-coding	NM_144779
hsa-miR-378e	CISH	protein-coding	NM_145071
hsa-miR-6855-5p	CISH	protein-coding	NM_145071
hsa-miR-371a-5p	ANKS1B	protein-coding	NM_152788
hsa-miR-378e	ANKS1B	protein-coding	NM_152788
hsa-miR-218-5p	NUP62	protein-coding	NM_153718
hsa-miR-6855-5p	NUP62	protein-coding	NM_153718
hsa-miR-218-5p	NUP62	protein-coding	NM_153719
hsa-miR-6855-5p	NUP62	protein-coding	NM_153719
hsa-miR-320e	MRPL11	protein-coding	NM_170739
hsa-miR-378e	MRPL11	protein-coding	NM_170739
hsa-miR-6855-5p	MRPL11	protein-coding	NM_170739
hsa-miR-378e	NOXO1	protein-coding	NM_172167
hsa-miR-6855-5p	NOXO1	protein-coding	NM_172167
hsa-miR-378e	NOXO1	protein-coding	NM_172168
hsa-miR-6855-5p	NOXO1	protein-coding	NM_172168
hsa-miR-378e	SLC25A41	protein-coding	NM_173637
hsa-miR-6855-5p	SLC25A41	protein-coding	NM_173637
hsa-miR-302a-3p	P2RY6	protein-coding	NM_176796
hsa-miR-6855-5p	P2RY6	protein-coding	NM_176796
hsa-miR-302a-3p	P2RY6	protein-coding	NM_176797
hsa-miR-6855-5p	P2RY6	protein-coding	NM_176797
hsa-miR-302a-3p	P2RY6	protein-coding	NM_176798
hsa-miR-6855-5p	P2RY6	protein-coding	NM_176798
hsa-miR-320e	FBH1	protein-coding	NM_178150
hsa-miR-6855-5p	FBH1	protein-coding	NM_178150
hsa-miR-302a-3p	ZNF454	protein-coding	NM_182594
hsa-miR-6855-5p	ZNF454	protein-coding	NM_182594
hsa-miR-371a-5p	SNX20	protein-coding	NM_182854
hsa-miR-6855-5p	SNX20	protein-coding	NM_182854
hsa-miR-187-3p	NEDD9	protein-coding	NM_182966
hsa-miR-6855-5p	NEDD9	protein-coding	NM_182966
hsa-miR-371a-5p	TSC22D1	protein-coding	NM_183422
hsa-miR-6855-5p	TSC22D1	protein-coding	NM_183422
hsa-miR-320e	PHC2	protein-coding	NM_198040
hsa-miR-378e	PHC2	protein-coding	NM_198040
hsa-miR-302a-3p	BCAN	protein-coding	NM_198427
hsa-miR-378e	BCAN	protein-coding	NM_198427
hsa-miR-371a-5p	TEX45	protein-coding	NM_198534
hsa-miR-6855-5p	TEX45	protein-coding	NM_198534
hsa-miR-187-3p	SIAH3	protein-coding	NM_198849
hsa-miR-6855-5p	SIAH3	protein-coding	NM_198849
hsa-miR-218-5p	TCF7	protein-coding	NM_201634
hsa-miR-6855-5p	TCF7	protein-coding	NM_201634
hsa-miR-320e	FOXI2	protein-coding	NM_207426
hsa-miR-378e	FOXI2	protein-coding	NM_207426
hsa-miR-378e	ARID5A	protein-coding	NM_212481
hsa-miR-6855-5p	ARID5A	protein-coding	NM_212481
hsa-miR-371a-5p	ST7-AS2	non-coding	NR_002331
hsa-miR-6855-5p	ST7-AS2	non-coding	NR_002331
hsa-miR-320e	BCRP3	non-coding	NR_024494
hsa-miR-6855-5p	BCRP3	non-coding	NR_024494
hsa-miR-302a-3p	FAM226B	non-coding	NR_026594
hsa-miR-378e	FAM226B	non-coding	NR_026594
hsa-miR-302a-3p	FAM226A	non-coding	NR_026595
hsa-miR-378e	FAM226A	non-coding	NR_026595
hsa-miR-371a-5p	LINC02210	non-coding	NR_026680
hsa-miR-378e	LINC02210	non-coding	NR_026680
hsa-miR-187-3p	TTC41P	non-coding	NR_027249
hsa-miR-6855-5p	TTC41P	non-coding	NR_027249
hsa-miR-371a-5p	LINC02210	non-coding	NR_027295
hsa-miR-378e	LINC02210	non-coding	NR_027295
hsa-miR-371a-5p	FXYD5	non-coding	NR_028406
hsa-miR-6855-5p	FXYD5	non-coding	NR_028406
hsa-miR-187-3p	MIR181C	non-coding	NR_029613
hsa-miR-371a-5p	MIR181C	non-coding	NR_029613
hsa-miR-320e	MIR320A	non-coding	NR_029714
hsa-miR-378e	MIR320A	non-coding	NR_029714
hsa-miR-302a-3p	MIR302D	non-coding	NR_029859
hsa-miR-6855-5p	MIR302D	non-coding	NR_029859
hsa-miR-187-3p	MIR196B	non-coding	NR_029911
hsa-miR-378e	MIR196B	non-coding	NR_029911
hsa-miR-187-3p	MIR329-1	non-coding	NR_029967
hsa-miR-6855-5p	MIR329-1	non-coding	NR_029967
hsa-miR-302a-3p	MIR708	non-coding	NR_030598
hsa-miR-378e	MIR708	non-coding	NR_030598
hsa-miR-187-3p	NDC1	non-coding	NR_033142
hsa-miR-6855-5p	NDC1	non-coding	NR_033142
hsa-miR-302a-3p	LINC01097	non-coding	NR_034054
hsa-miR-6855-5p	LINC01097	non-coding	NR_034054
hsa-miR-302a-3p	APCDD1L-DT	non-coding	NR_034147
hsa-miR-6855-5p	APCDD1L-DT	non-coding	NR_034147
hsa-miR-378e	MIR3188	non-coding	NR_036155
hsa-miR-6855-5p	MIR3188	non-coding	NR_036155
hsa-miR-187-3p	CES2	non-coding	NR_036684
hsa-miR-371a-5p	CES2	non-coding	NR_036684
hsa-miR-320e	BCRP2	non-coding	NR_037566
hsa-miR-6855-5p	BCRP2	non-coding	NR_037566
hsa-miR-371a-5p	SERF2-C15ORF63	non-coding	NR_037673
hsa-miR-6855-5p	SERF2-C15ORF63	non-coding	NR_037673
hsa-miR-320e	PPT2-EGFL8	non-coding	NR_037861
hsa-miR-6855-5p	PPT2-EGFL8	non-coding	NR_037861
hsa-miR-187-3p	MIR4492	non-coding	NR_039713
hsa-miR-378e	MIR4492	non-coding	NR_039713
hsa-miR-6855-5p	MIR4492	non-coding	NR_039713
hsa-miR-320e	MIR4530	non-coding	NR_039755
hsa-miR-6855-5p	MIR4530	non-coding	NR_039755
hsa-miR-320e	MIR4635	non-coding	NR_039778
hsa-miR-378e	MIR4635	non-coding	NR_039778
hsa-miR-371a-5p	MIR4748	non-coding	NR_039903
hsa-miR-6855-5p	MIR4748	non-coding	NR_039903
hsa-miR-187-3p	DCST1-AS1	non-coding	NR_040773
hsa-miR-6855-5p	DCST1-AS1	non-coding	NR_040773
hsa-miR-371a-5p	CMPK2	non-coding	NR_046236
hsa-miR-378e	CMPK2	non-coding	NR_046236
hsa-miR-302a-3p	NEIL1	non-coding	NR_046311
hsa-miR-378e	NEIL1	non-coding	NR_046311
hsa-miR-187-3p	ATP8B3	non-coding	NR_047593
hsa-miR-378e	ATP8B3	non-coding	NR_047593
hsa-miR-187-3p	HPS4	non-coding	NR_073136
hsa-miR-6855-5p	HPS4	non-coding	NR_073136
hsa-miR-320e	DEFB119	non-coding	NR_073151
hsa-miR-6855-5p	DEFB119	non-coding	NR_073151
hsa-miR-320e	DEFB119	non-coding	NR_073152
hsa-miR-6855-5p	DEFB119	non-coding	NR_073152
hsa-miR-320e	DEFB119	non-coding	NR_073153
hsa-miR-6855-5p	DEFB119	non-coding	NR_073153
hsa-miR-378e	TNRC18P1	non-coding	NR_077215
hsa-miR-6855-5p	TNRC18P1	non-coding	NR_077215
hsa-miR-187-3p	LINC01301	non-coding	NR_103854
hsa-miR-6855-5p	LINC01301	non-coding	NR_103854
hsa-miR-371a-5p	RAD51C	non-coding	NR_103873
hsa-miR-6855-5p	RAD51C	non-coding	NR_103873
hsa-miR-320e	LINC00603	non-coding	NR_104633
hsa-miR-378e	LINC00603	non-coding	NR_104633
hsa-miR-378e	MIR6800	non-coding	NR_106858
hsa-miR-6855-5p	MIR6800	non-coding	NR_106858
hsa-miR-187-3p	MIR6871	non-coding	NR_106931
hsa-miR-6855-5p	MIR6871	non-coding	NR_106931
hsa-miR-320e	MIR6892	non-coding	NR_106952
hsa-miR-378e	MIR6892	non-coding	NR_106952
